# Supplementary material for: The glycosylation design space for recombinant lysosomal replacement enzymes produced in CHO cells
Source: PubMed Central journal article supplement (PMC6491494; doi:10.1038/s41467-019-09809-3), 2019-04-30
Supplement: 41467_2019_9809_MOESM1_ESM.pdf [file 41467_2019_9809_MOESM1_ESM.pdf]

## The Glycosylation Design Space for Recombinant Lysosomal Replacement Enzymes Produced in CHO Cells

Tian *et al.*

### Supplementary Information

**Supplementary Figure 1.** RNAseq transcriptome profiling of CHO cells showing predicted expression of selected genes.

**Supplementary Figure 2.** Detailed presentation of N-glycans identified by site-specific N-glycan profiling of GLA produced in CHO WT and engineered KO/KI clones as indicated.

**Supplementary Figure 3.** Characterization of growth and yield performance of glycoengineered CHO clones expressing GLA.

**Supplementary Figure 4.** Detailed presentation of N-glycans identified by site-specific N-glycan profiling of GBA produced in CHO WT and engineered KO clones as indicated.

**Supplementary Figure 5.** Targeted MS/MS manual annotation of the most representative glycopeptides.

**Supplementary Figure 6.** In vitro assay of enzyme specific activity and plasma stability of GLA glycovariants.

**Supplementary Figure 7.** SDS-PAGE Western blot analysis of infused GLA glycovariants in mice plasma.

**Supplementary Figure 8.** Relative distribution of GLA glycovariants among the four major visceral organs.

**Supplementary Table 1.** CRISPR gRNA design and list of PCR primers used for gRNA target sites.

**Supplementary Table 2.** Summary of CHO mutant clones stably expressing GLA and cell line ancestry.

**Supplementary Table 3.** Summary of CHO mutant clones stably expressing GBA and cell line ancestry.

**Supplementary Table 4.** Sequence analysis of CHO mutant clones stably expressing GBA.

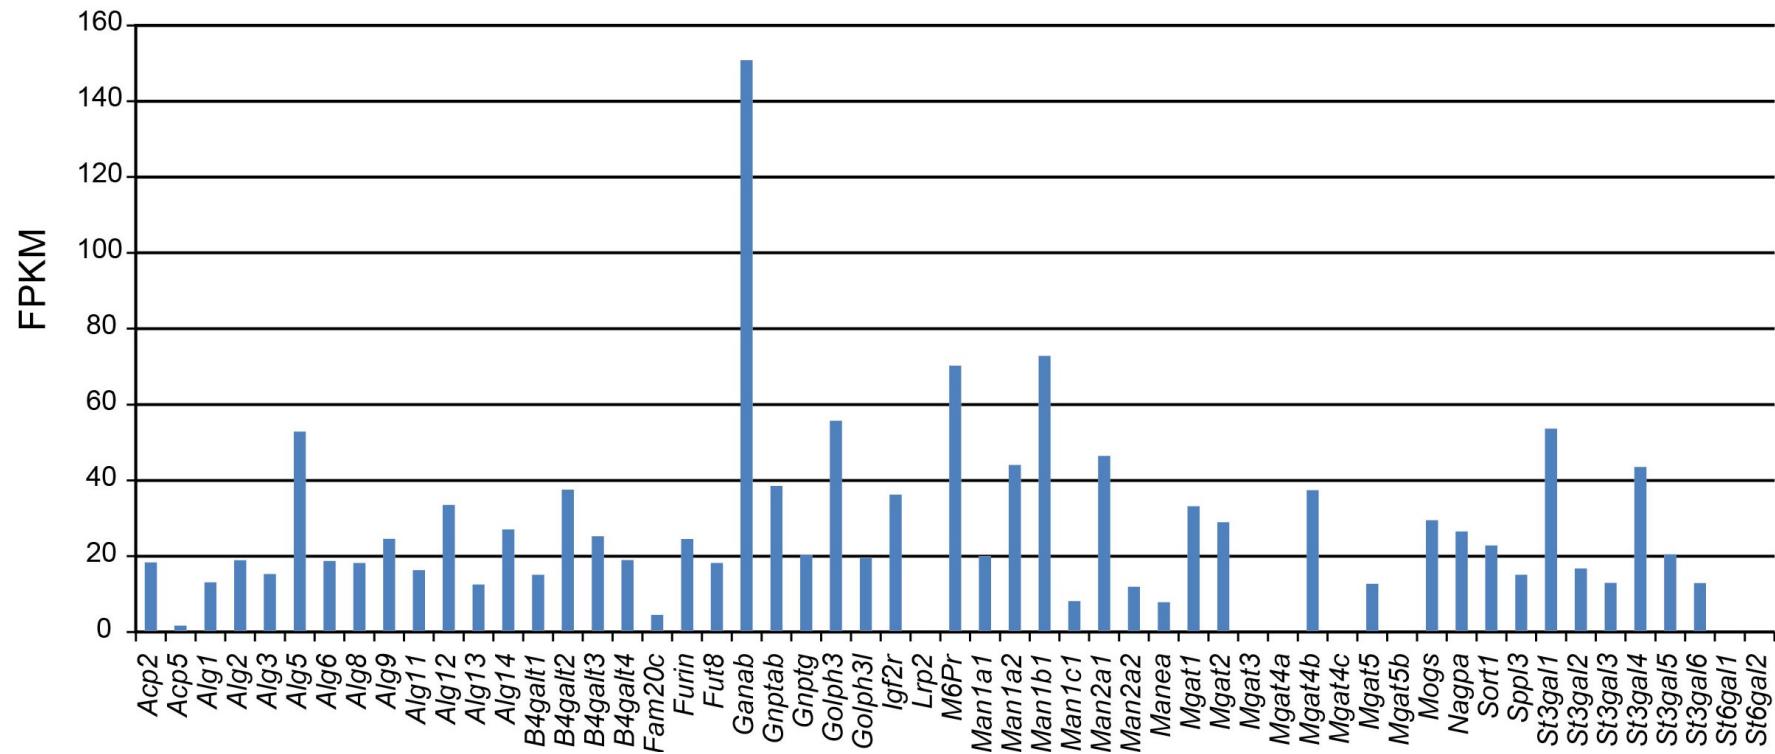

**Supplementary Figure 1.** RNAseq transcriptome profiling of CHO cells showing predicted expression of select genes studied.

RNAseq analysis was performed with CHO  $GS^{-/-}$  cells as previously reported<sup>1</sup>. Genes known to function in N-glycosylation and M6P-tagging, including glycosyltransferases, glycosylhydrolases, enzymes involved in dolichol-linked precursor oligosaccharide synthesis, and other related genes, are shown. Source data are provided as a Source Data file.

<sup>1</sup>Yang, Z. et al. Engineered CHO cells for production of diverse, homogeneous glycoproteins. *Nat. Biotechnol.* **33**, 842-844 (2015).

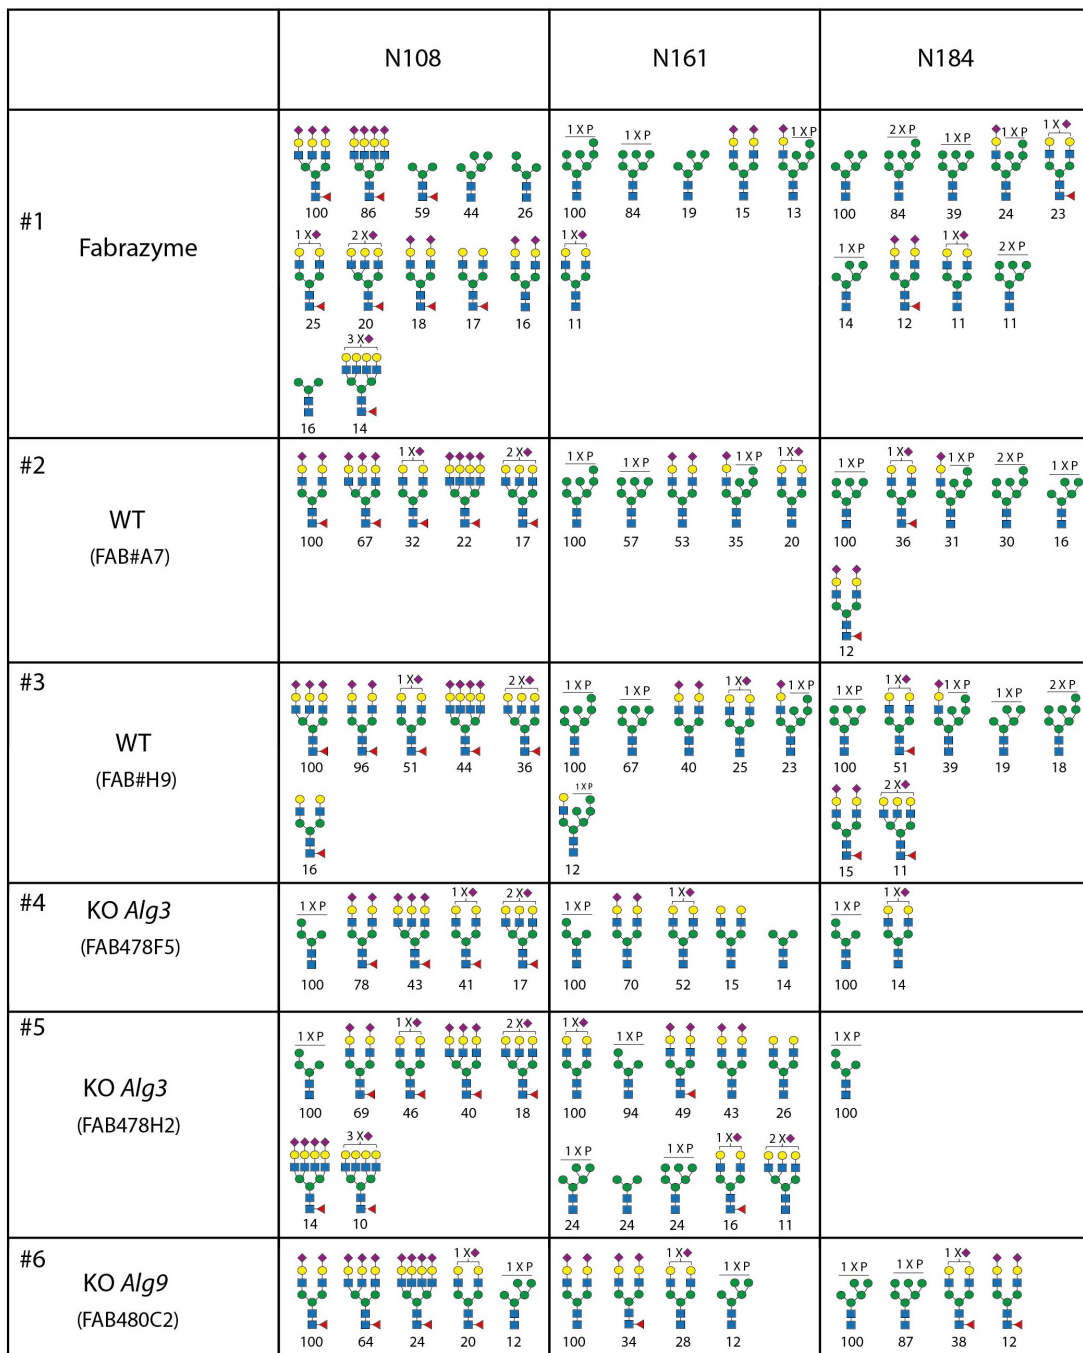

**Supplementary Figure 2.** Detailed presentation of N-glycans identified by site-specific N-glycan profiling of GLA produced in CHO WT and engineered KO/KI clones as indicated.

N-glycan structures and their relative abundances at each of the three N-glycosites (N108, N161, and N184) of GLA are illustrated with their relative abundance adjusted to the most abundant structure. Minor glycoforms identified with relative abundance less than 10% are not shown. Same N-glycan composition may represent isobaric structures.

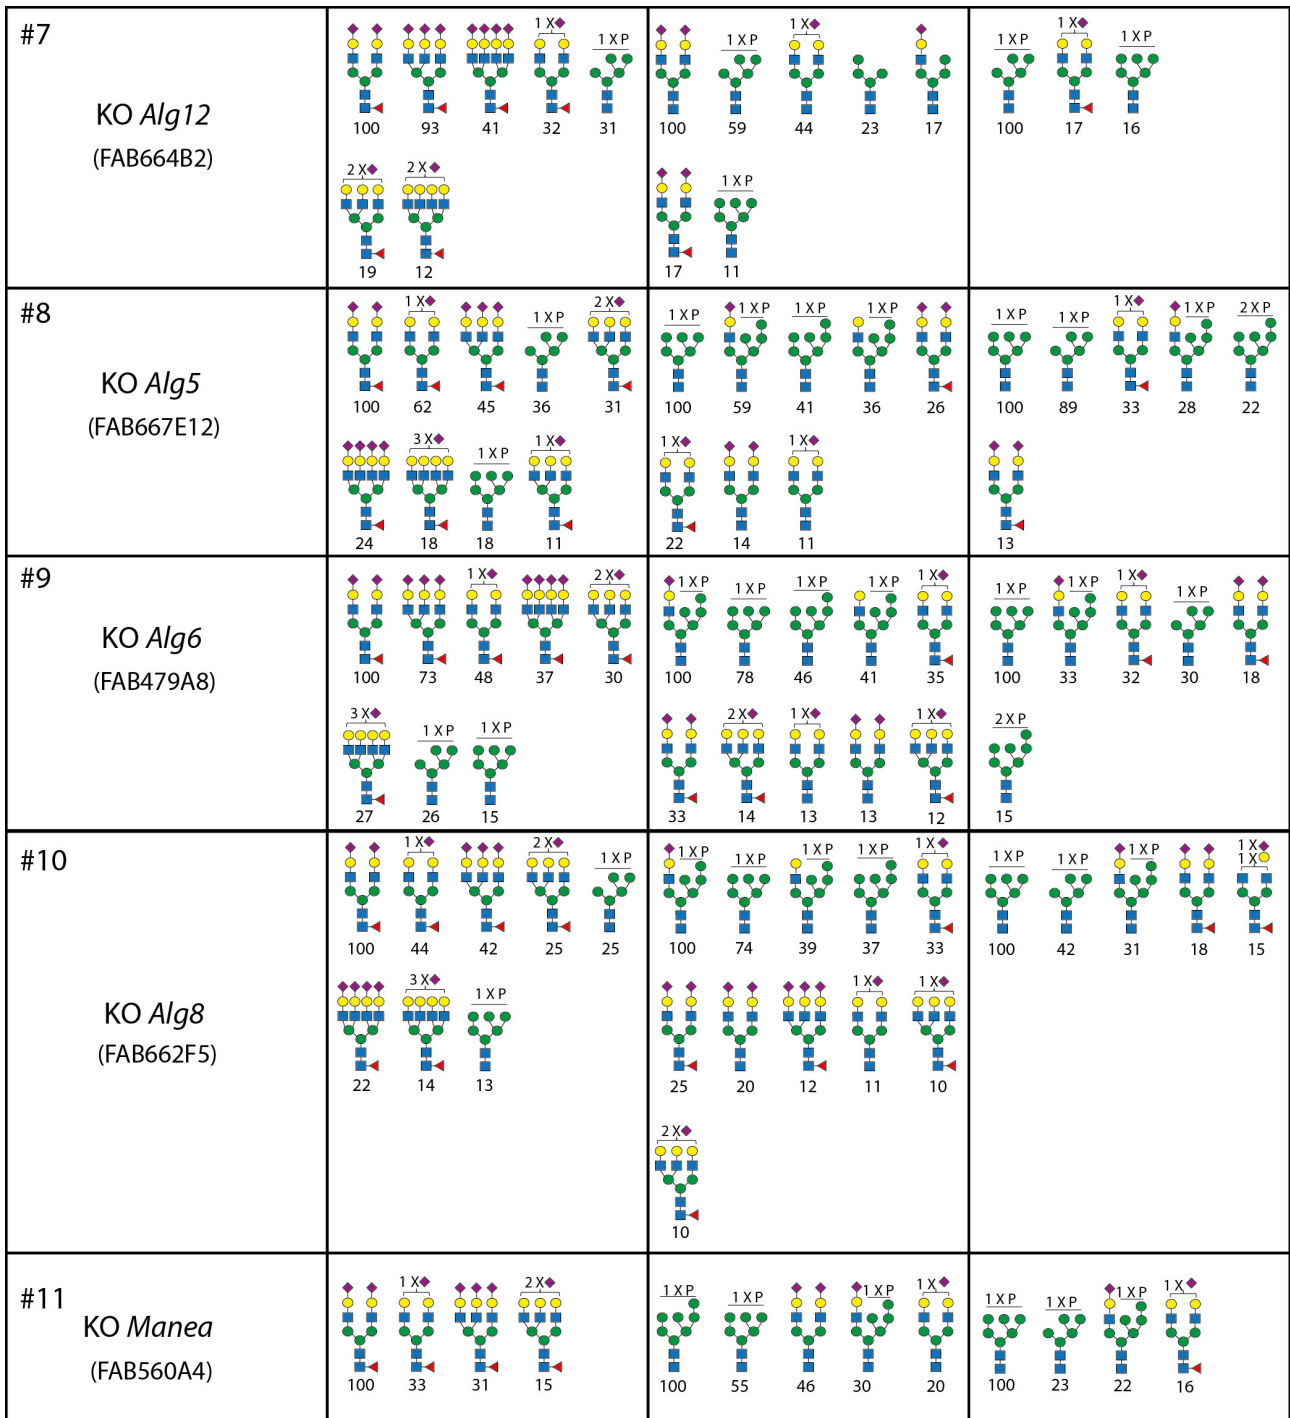

Supplementary Figure 2 continued.

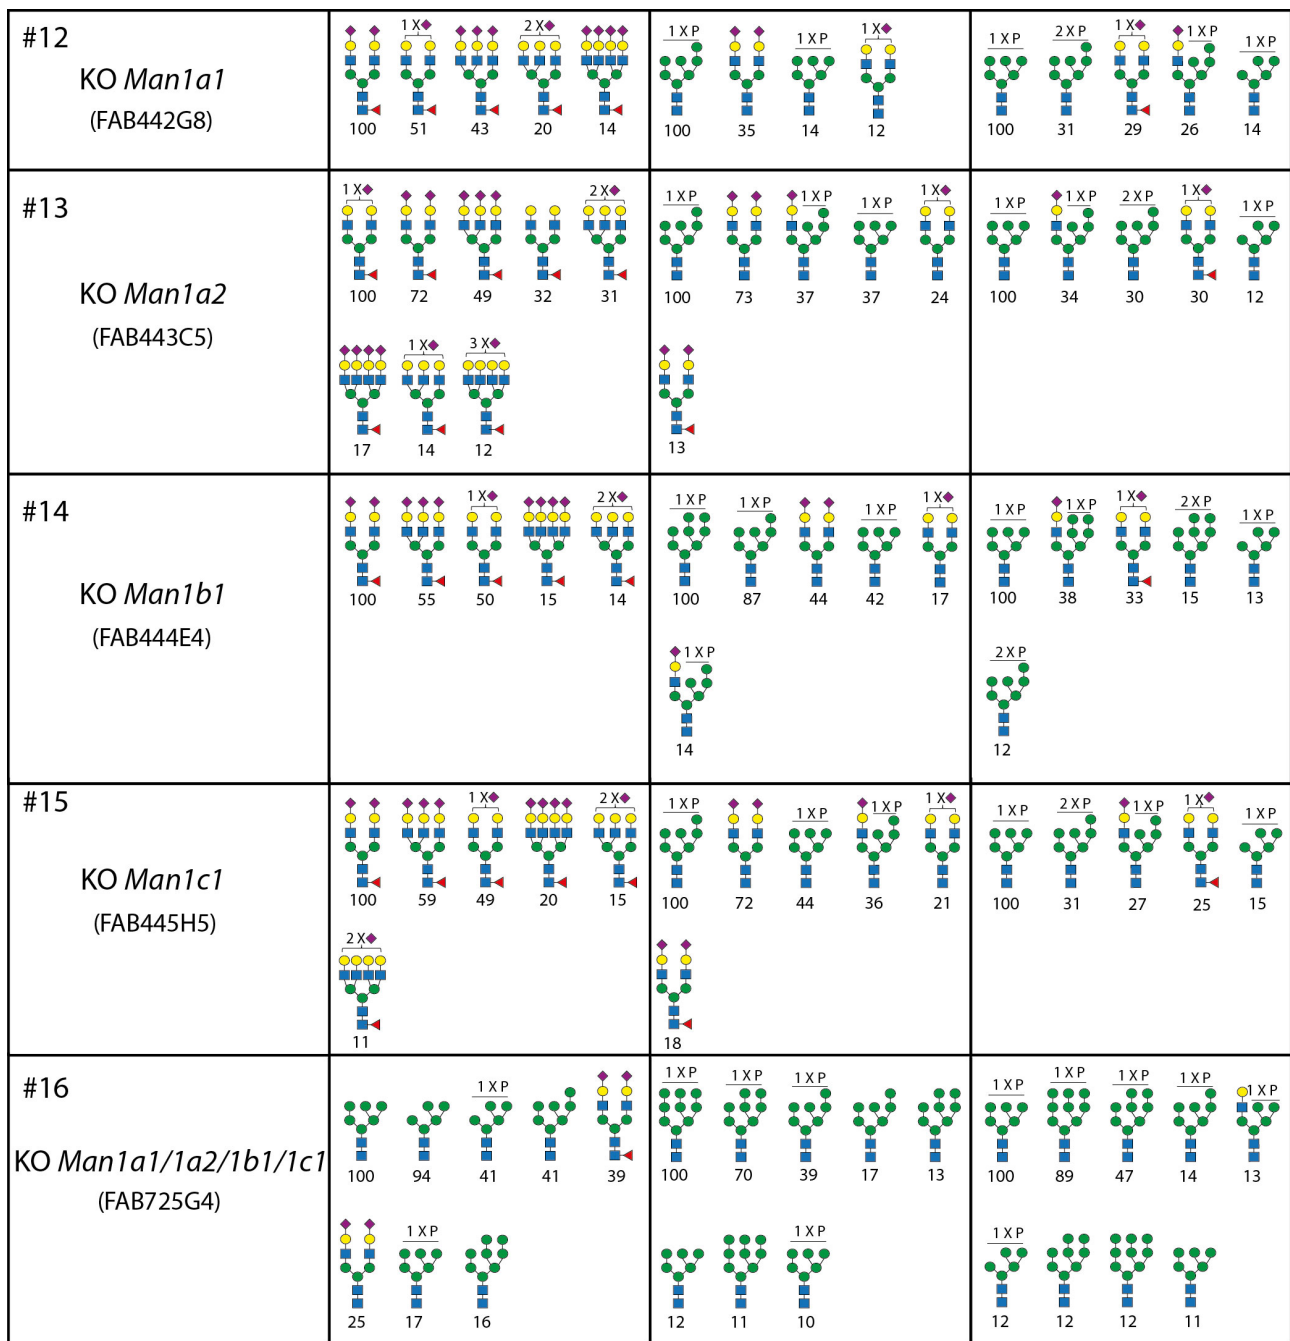

Supplementary Figure 2 continued.

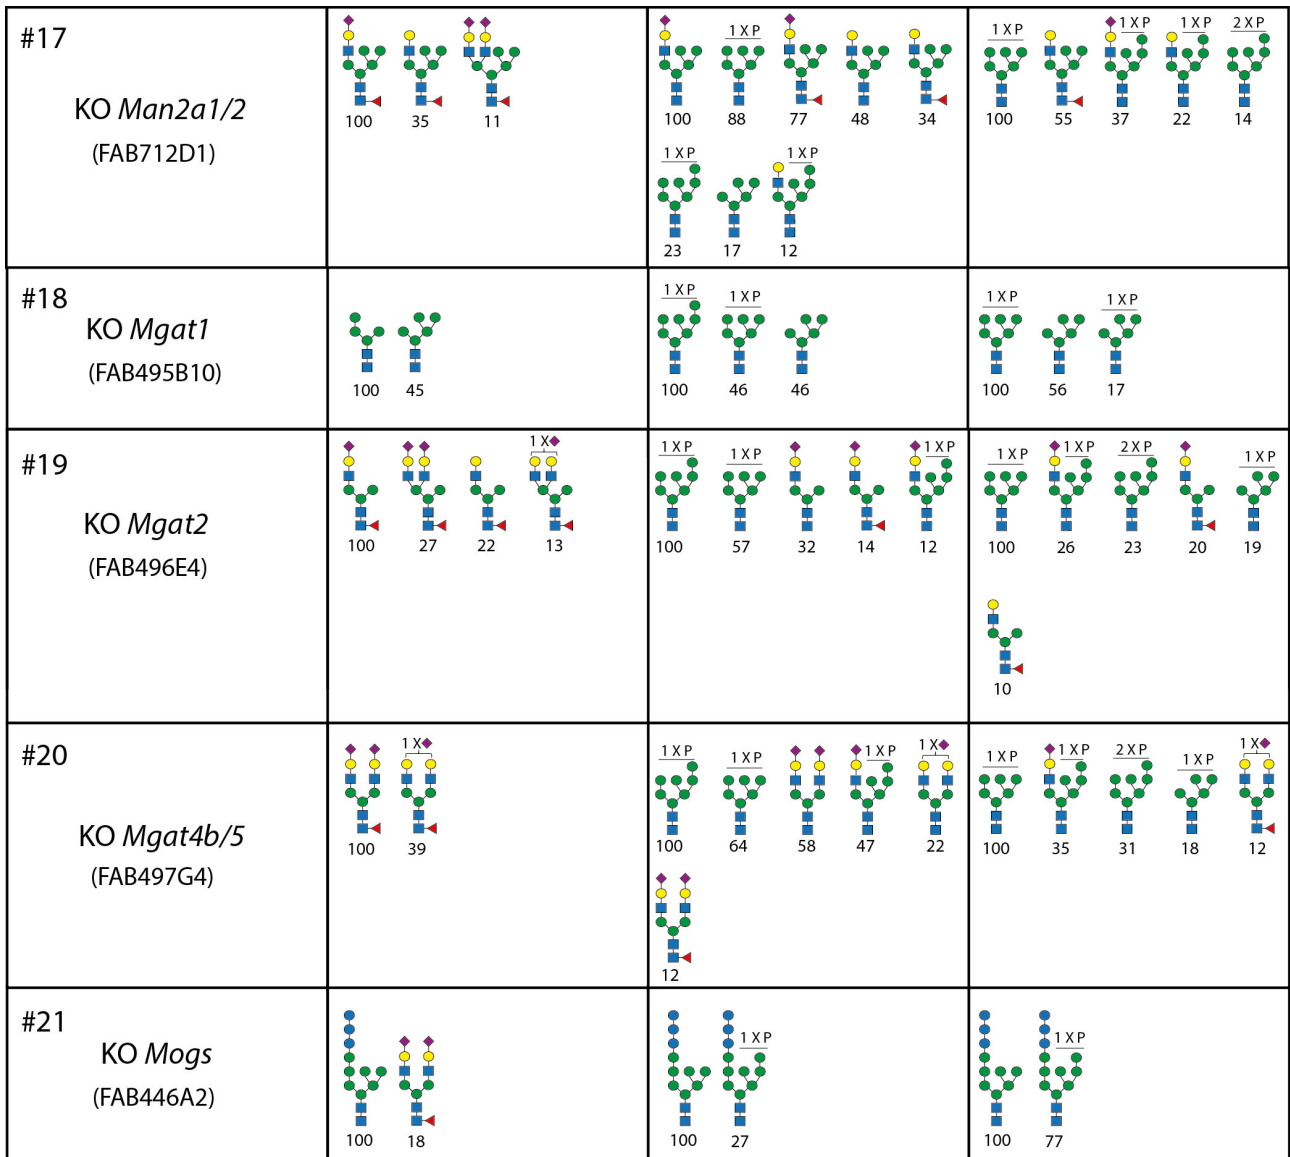

Supplementary Figure 2 continued.

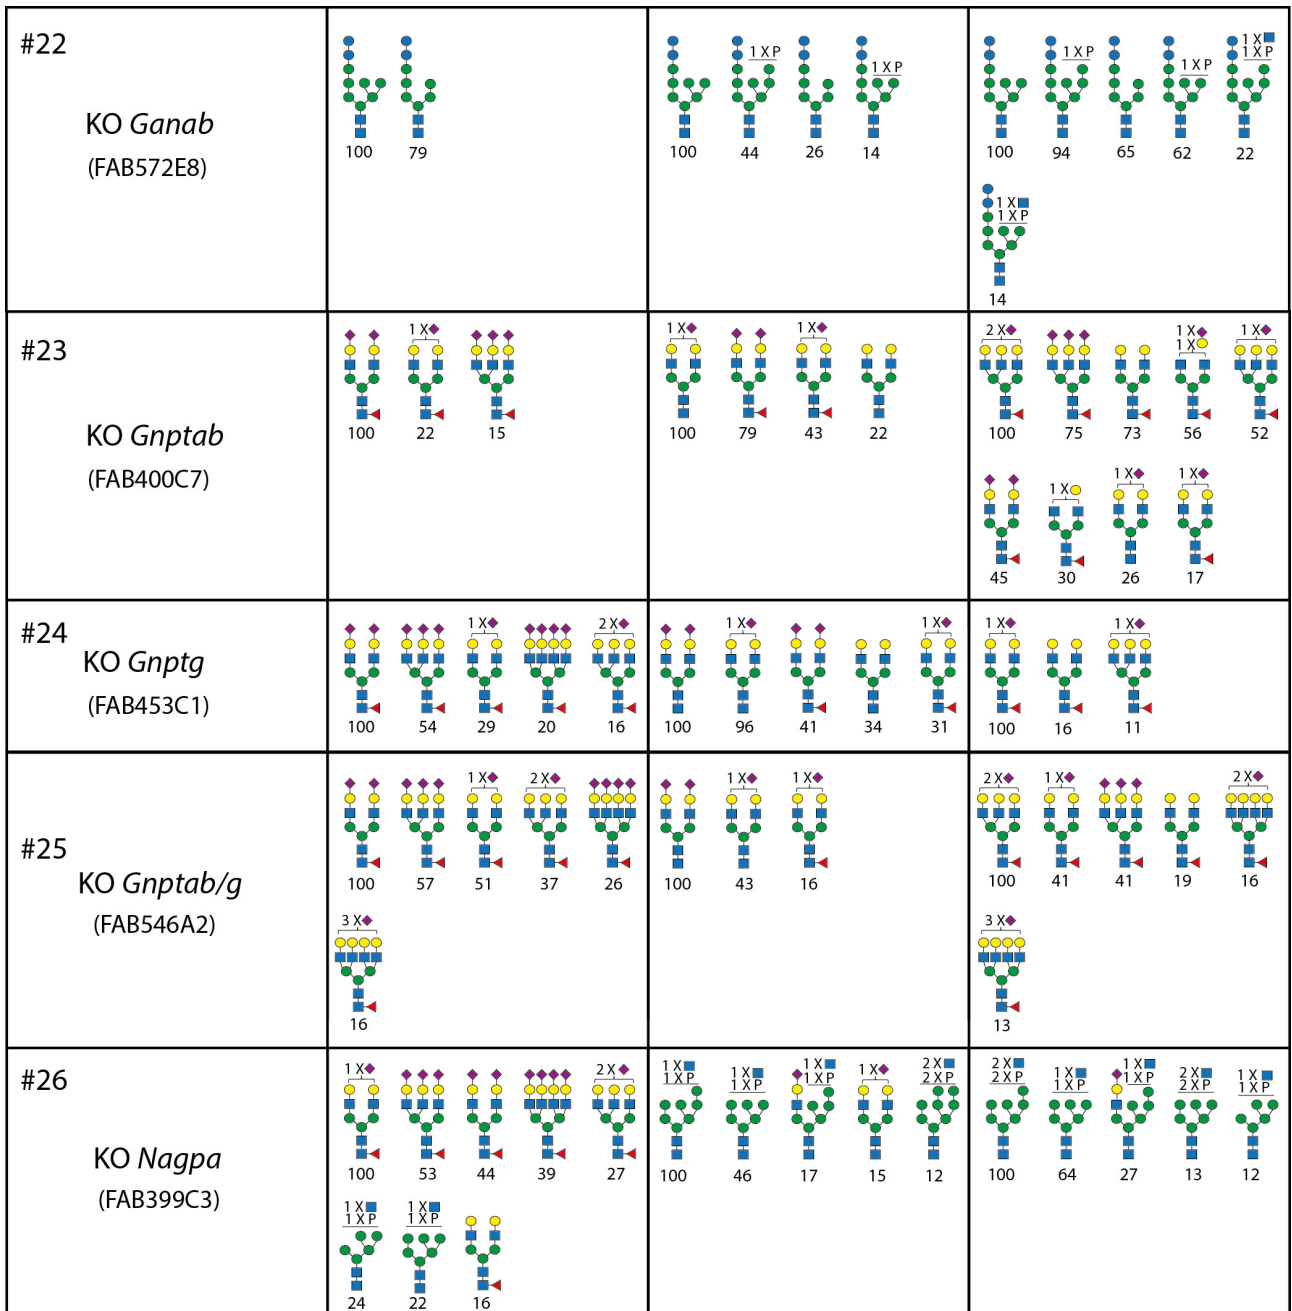

Supplementary Figure 2 continued.

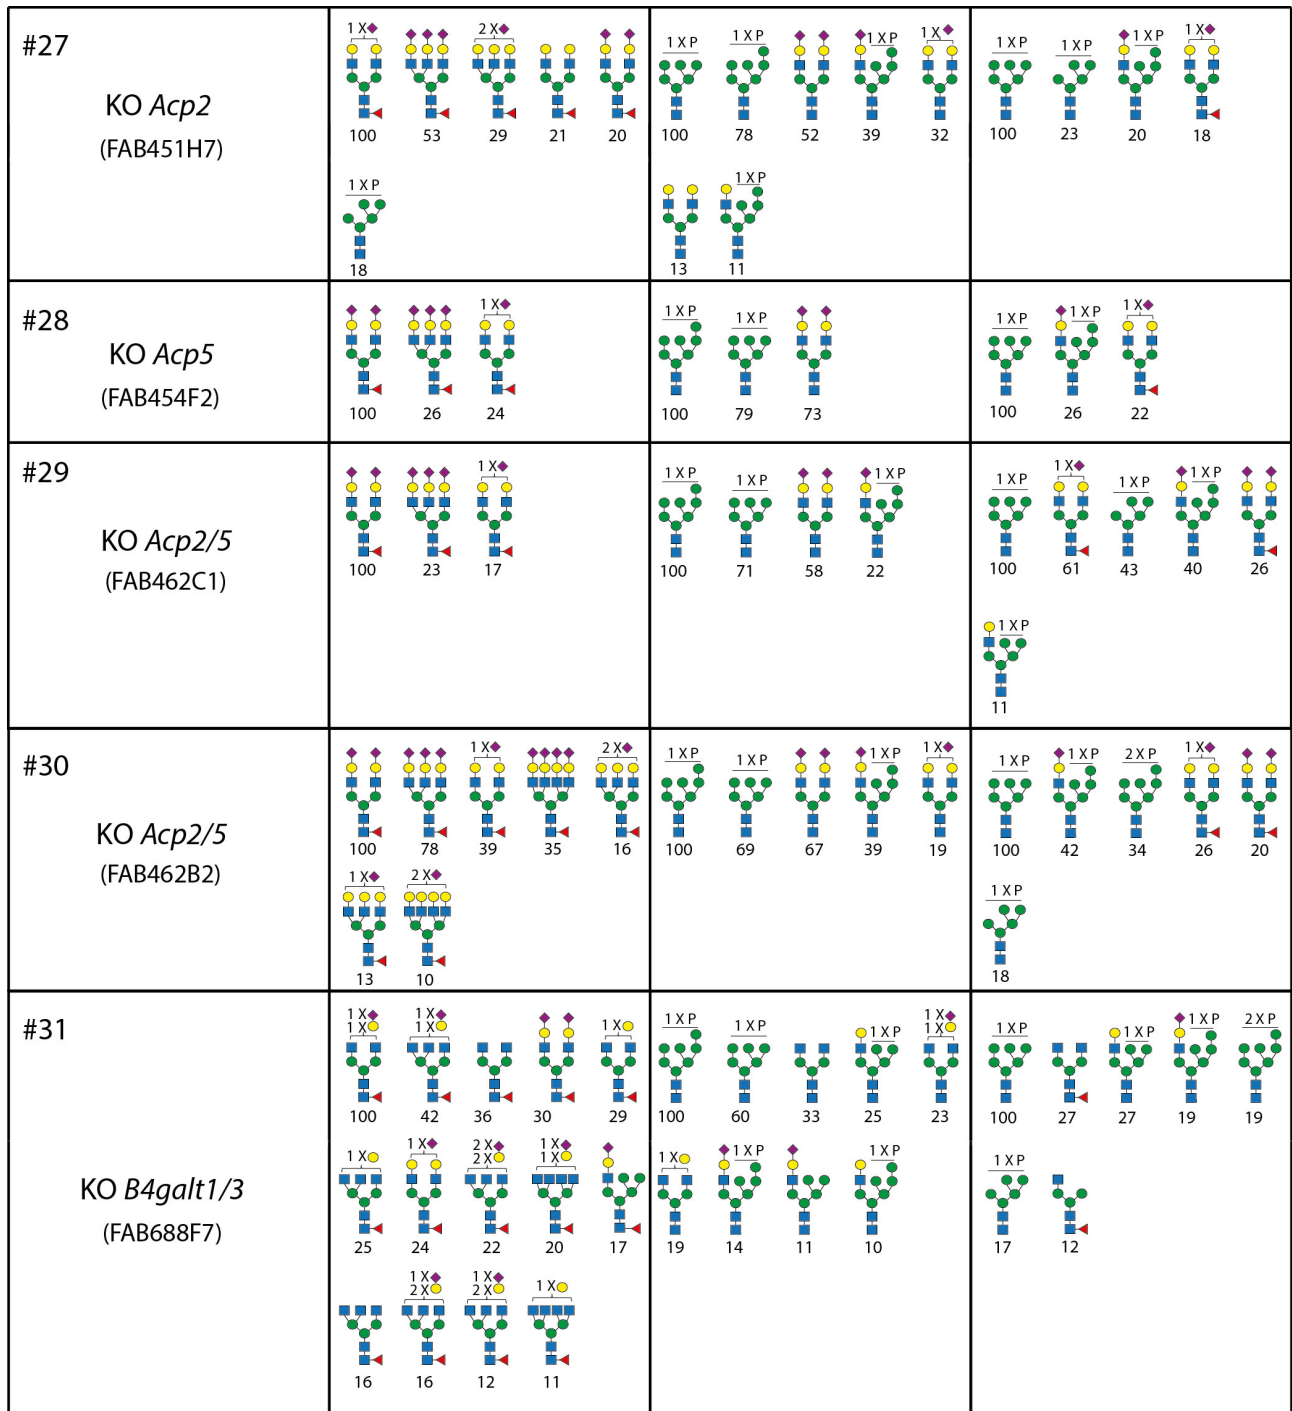

Supplementary Figure 2 continued.

(Page 6 of 12, continued)



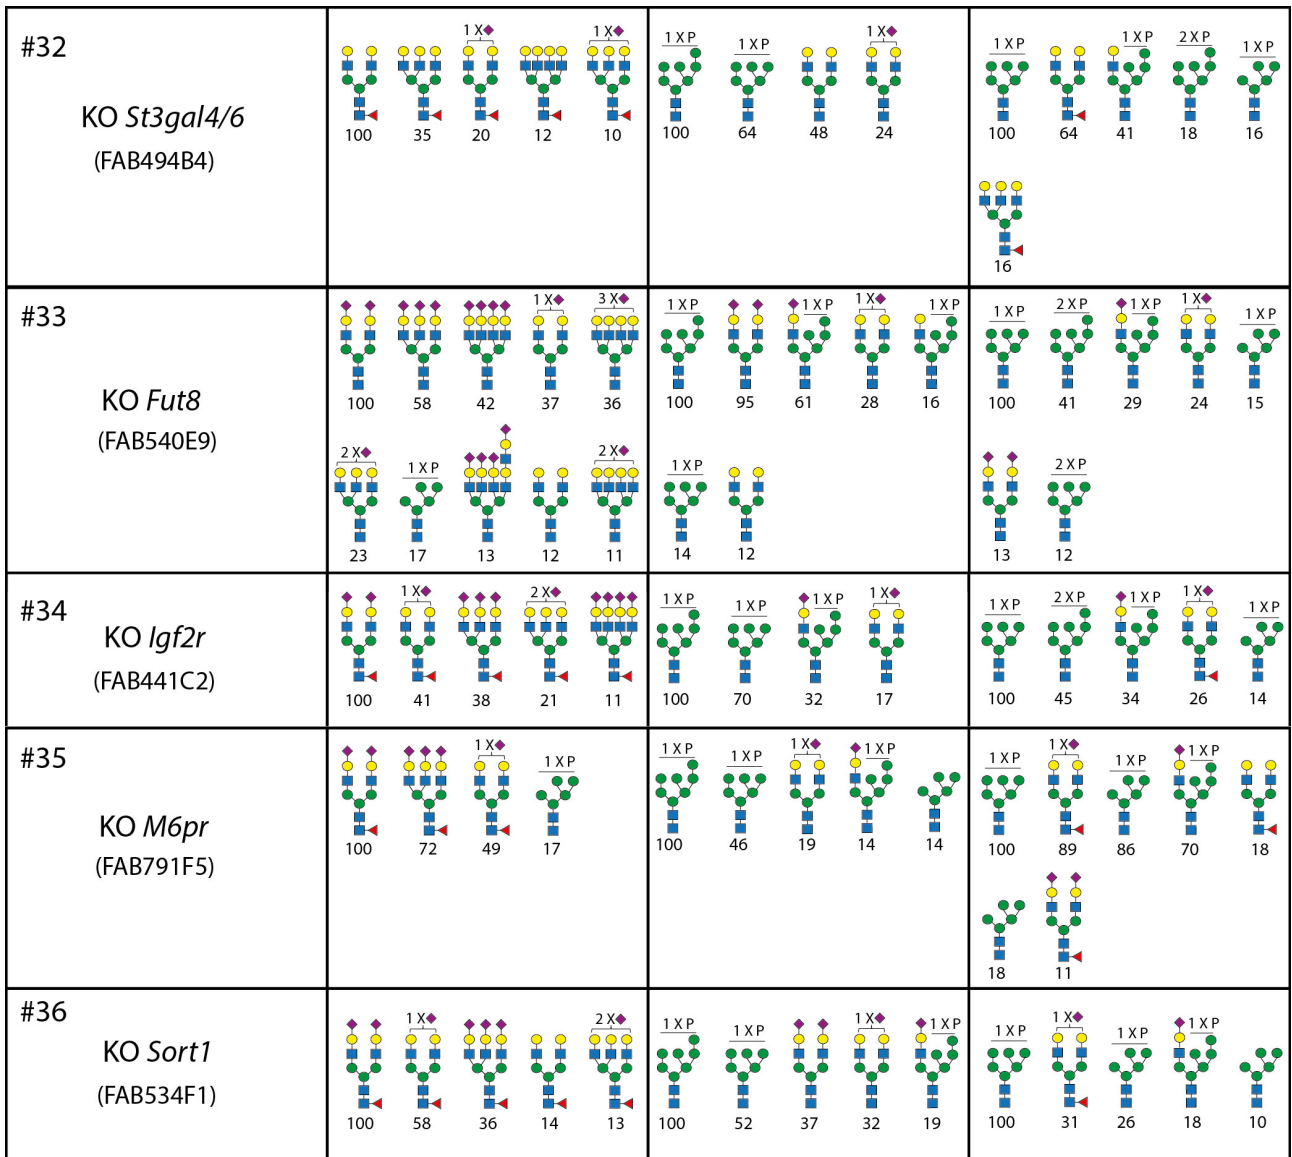

Supplementary Figure 2 continued.

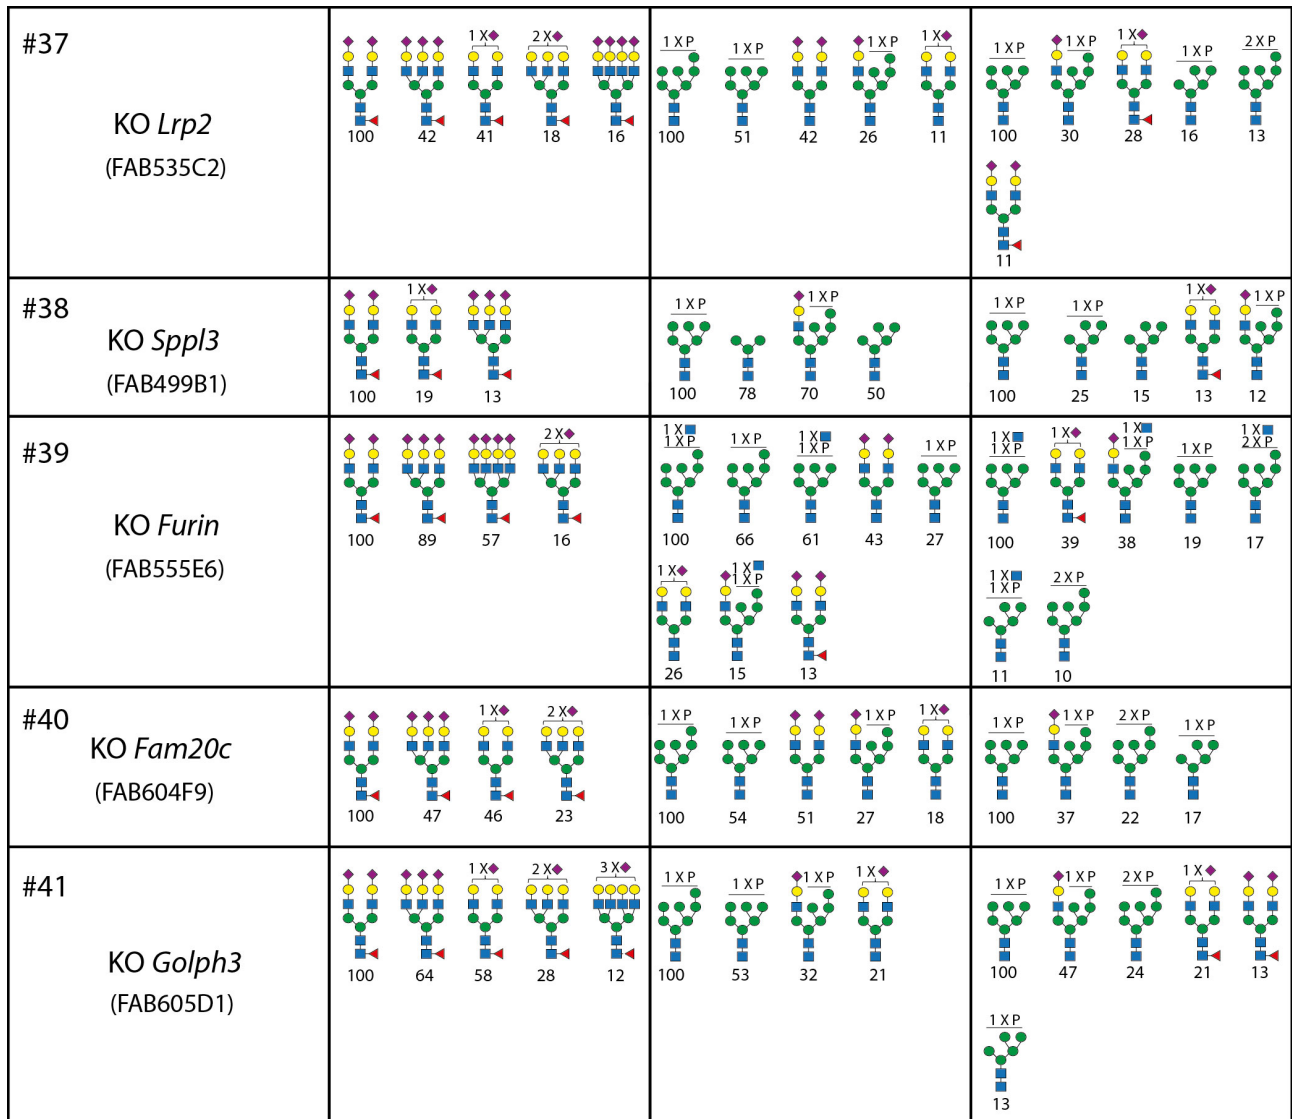

Supplementary Figure 2 continued.

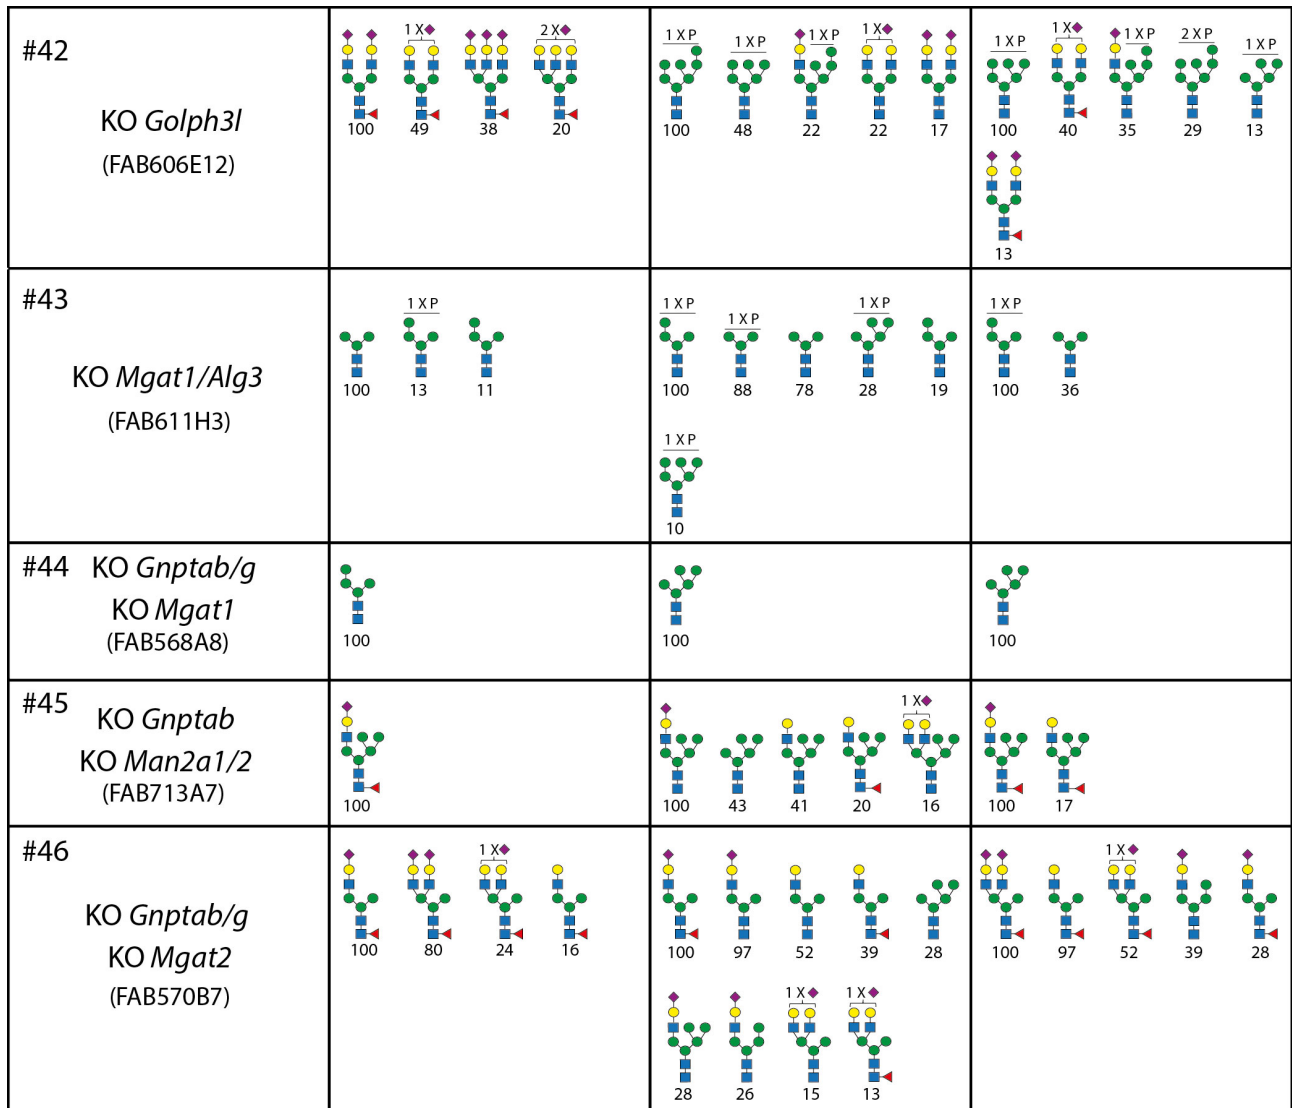

Supplementary Figure 2 continued.

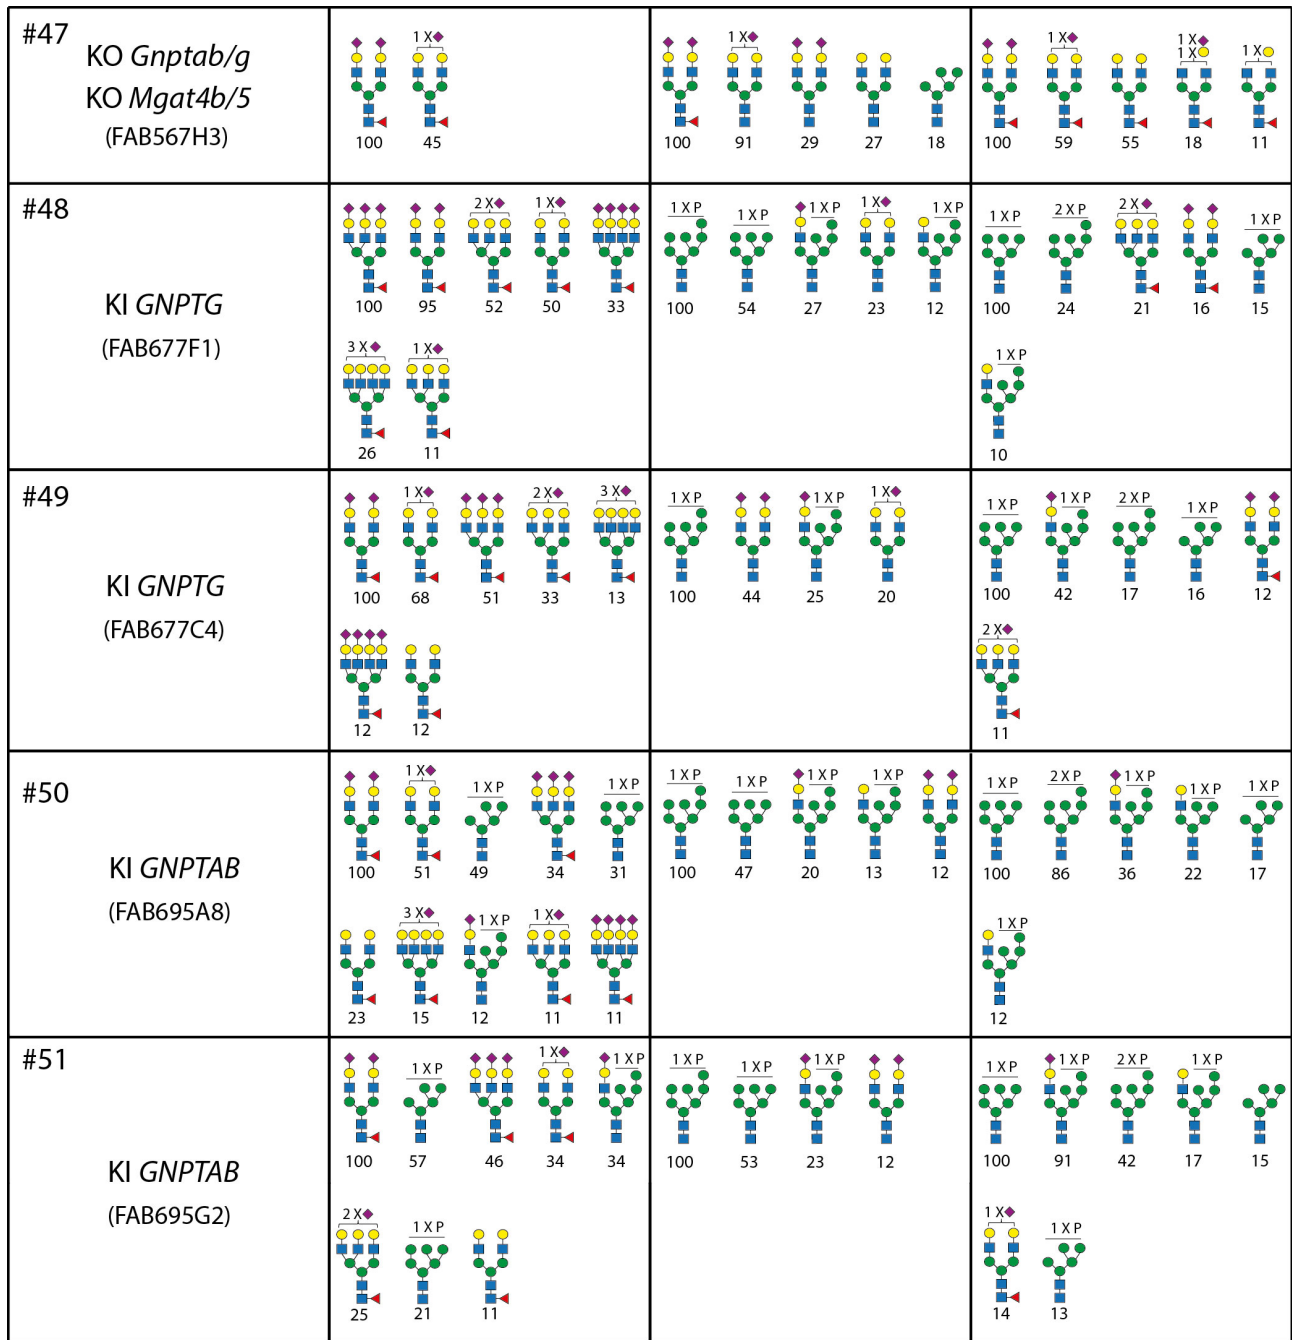

Supplementary Figure 2 continued.

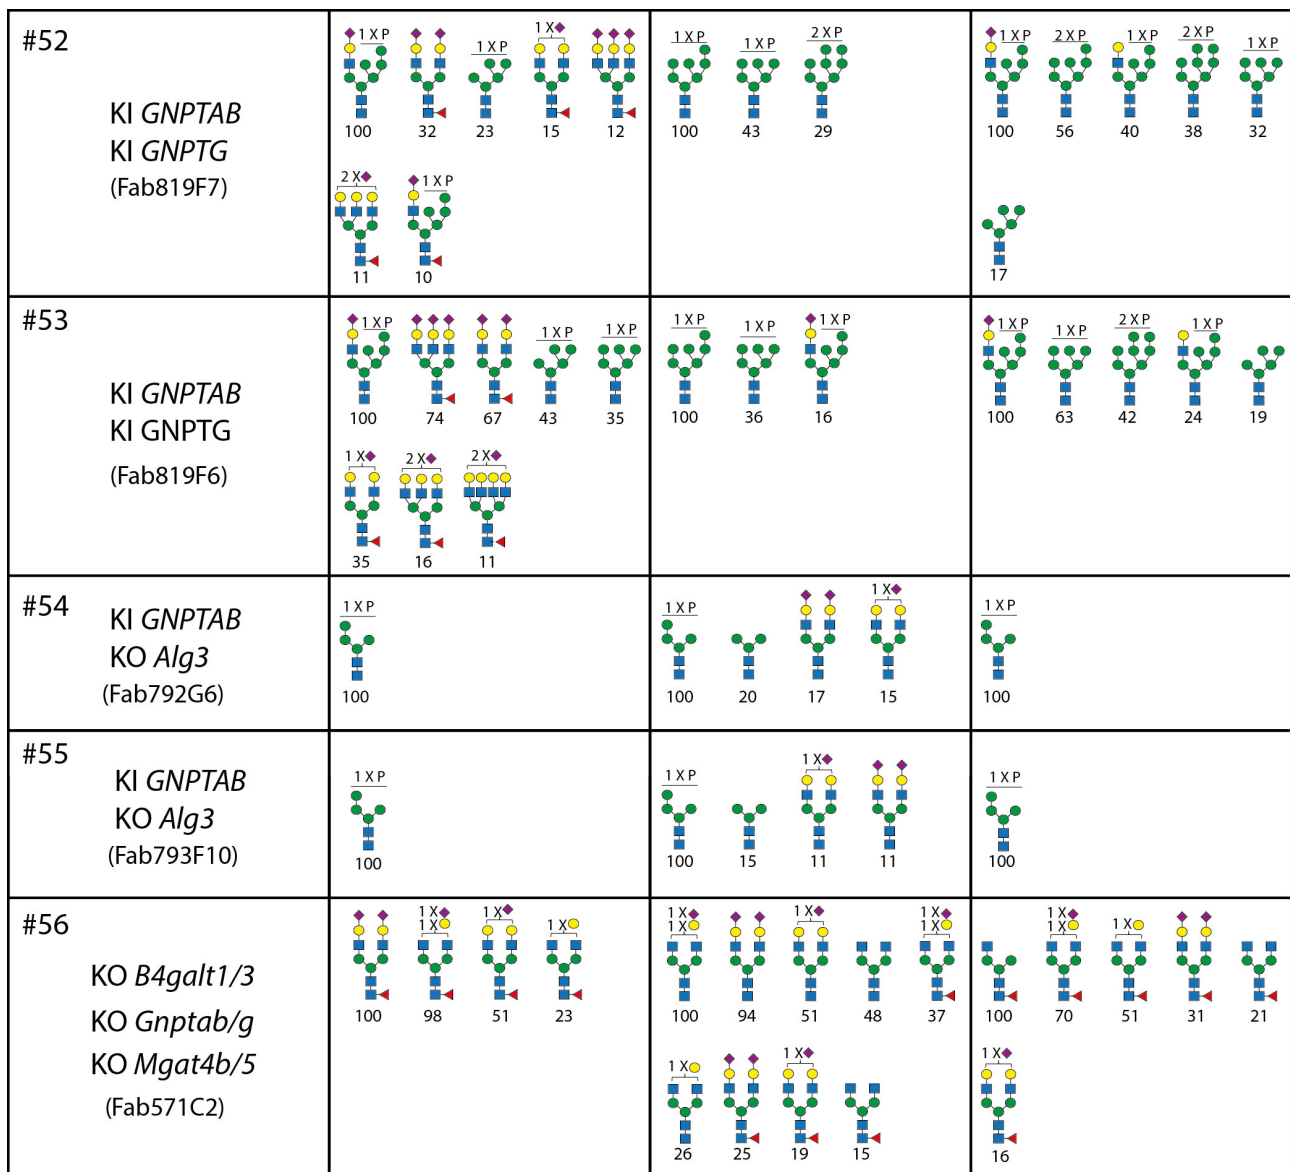

Supplementary Figure 2 continued.

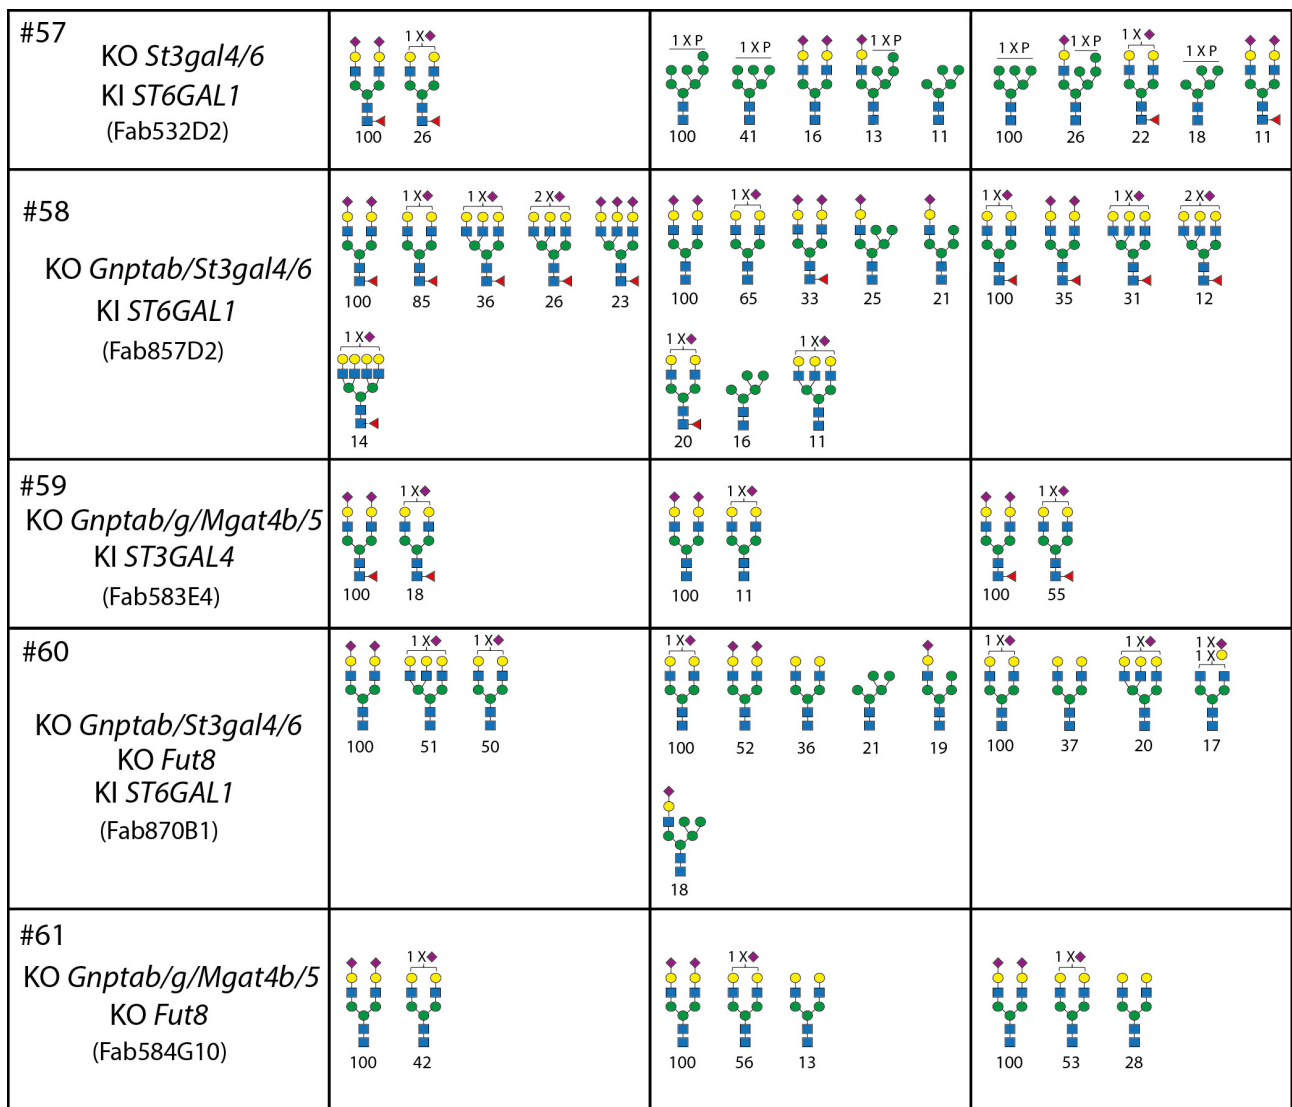

Supplementary Figure 2 continued.

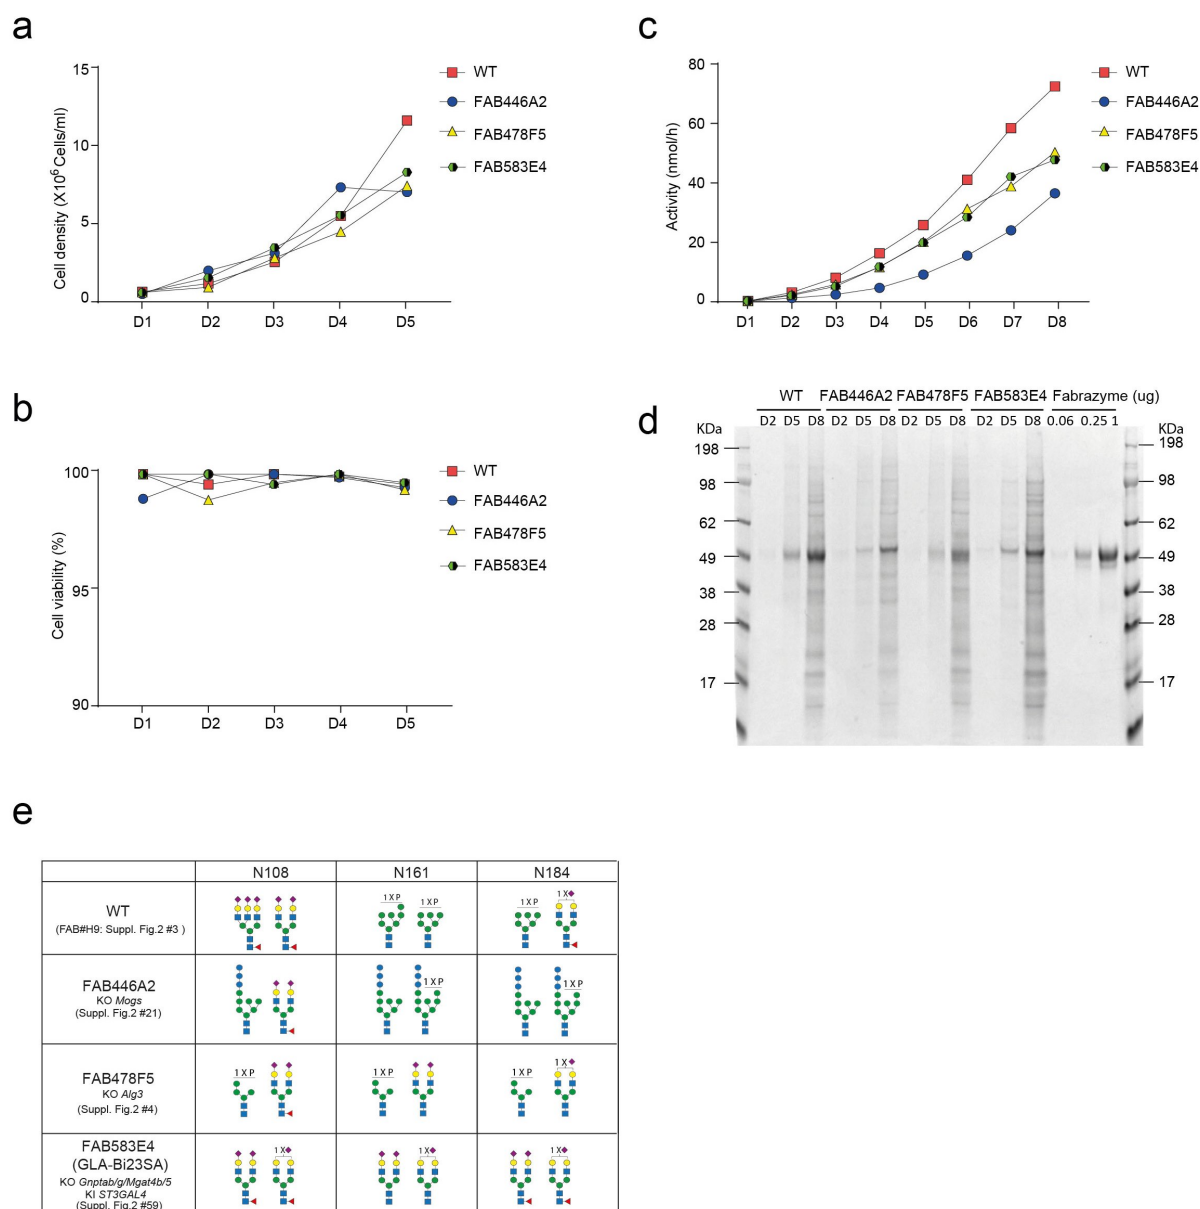

**Supplementary Figure 3.** Characterization of growth and yield performance of glycoengineered CHO clones expressing GLA.

**a** Viable cell density and **b** cell viability as determined by Trypan blue exclusion test. Data from day 1-5 are shown as accurate cell counting after day 6 was complicated by tendency for clumping of cells. **c** Yield of GLA enzyme activity determined in culture medium (2.5  $\mu$ L) by release of p-nitrophenol per hour with a pNP-Gal enzyme assay. The substrate concentration was reduced to 1.2mM to fit the linear regression of absorbance at 405nm. **d** SDS-PAGE Coomassie analysis of GLA in culture medium (10  $\mu$ L loaded) after two, five and eight days of culture (D2, D5 and D8, respectively). **e** Summary of the glycan features of the glycoengineered CHO clones and gene modification information. The two most abundant N-glycans are illustrated and detailed structures shown in **Supplementary Fig. 2, Panels 3, 21, 4 and 59**). Source data are provided as a Source Data file.

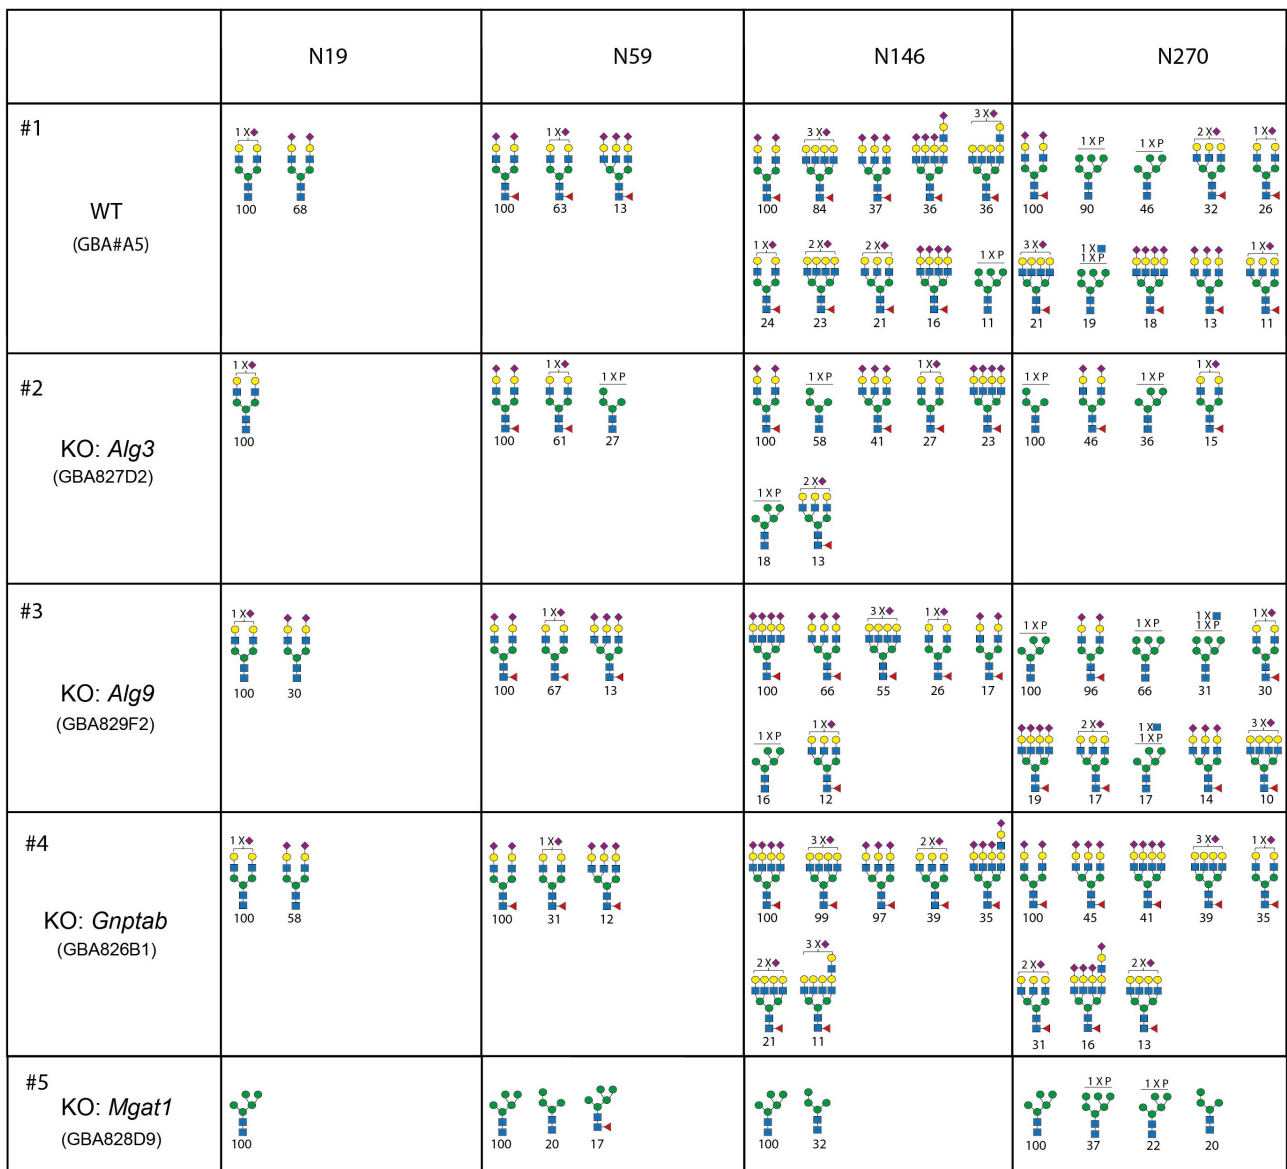

**Supplementary Figure 4.** Detailed presentation of N-glycans identified by site-specific N-glycan profiling of GBA produced in CHO WT and engineered KO clones as indicated.

N-glycan structures and their relative abundances at each of the four N-glycosites (N19, N59, N146, and N270) of GBA are illustrated with their relative abundance adjusted to the most abundant structure. Minor glycoforms identified with relative abundance less than 10% are not shown. Same N-glycan composition may represent isobaric structures.



|                                                         |                                                                                              |                                                                                                    |                                                                                                     |                                                                                                         |
|---------------------------------------------------------|----------------------------------------------------------------------------------------------|----------------------------------------------------------------------------------------------------|-----------------------------------------------------------------------------------------------------|---------------------------------------------------------------------------------------------------------|
| <p>#6<br/>KO: <i>Mgat1</i><br/>(GBA828E9)</p>           |  <p>100</p> |  <p>100 18</p>    |  <p>100 16</p>     |  <p>100 33 25 19</p> |
| <p>#7<br/>KO: <i>Gnptab/Mgat1</i><br/>(GBA831C8)</p>    |  <p>100</p> |  <p>100 20 16</p> |  <p>100</p>        |  <p>100 23</p>       |
| <p>#8<br/>KO: <i>Gnptab/Mgat1</i><br/>(GBA831F10)</p>   |  <p>100</p> |  <p>100 14</p>    |  <p>100 15</p>     |  <p>100 21</p>       |
| <p>#9<br/>KO: <i>Gnptab/Man2a1/2</i><br/>(GBA900D6)</p> |  <p>100</p> |  <p>100</p>       |  <p>100 21 11</p> |  <p>100 12</p>       |
| <p>#10<br/>KO: <i>Gnptab/Mgat2</i><br/>(GBA901D9)</p>   |  <p>100</p> |  <p>100 45 19</p> |  <p>100 32</p>     |  <p>100 93 47 19</p> |

Supplementary Figure 4 continued.

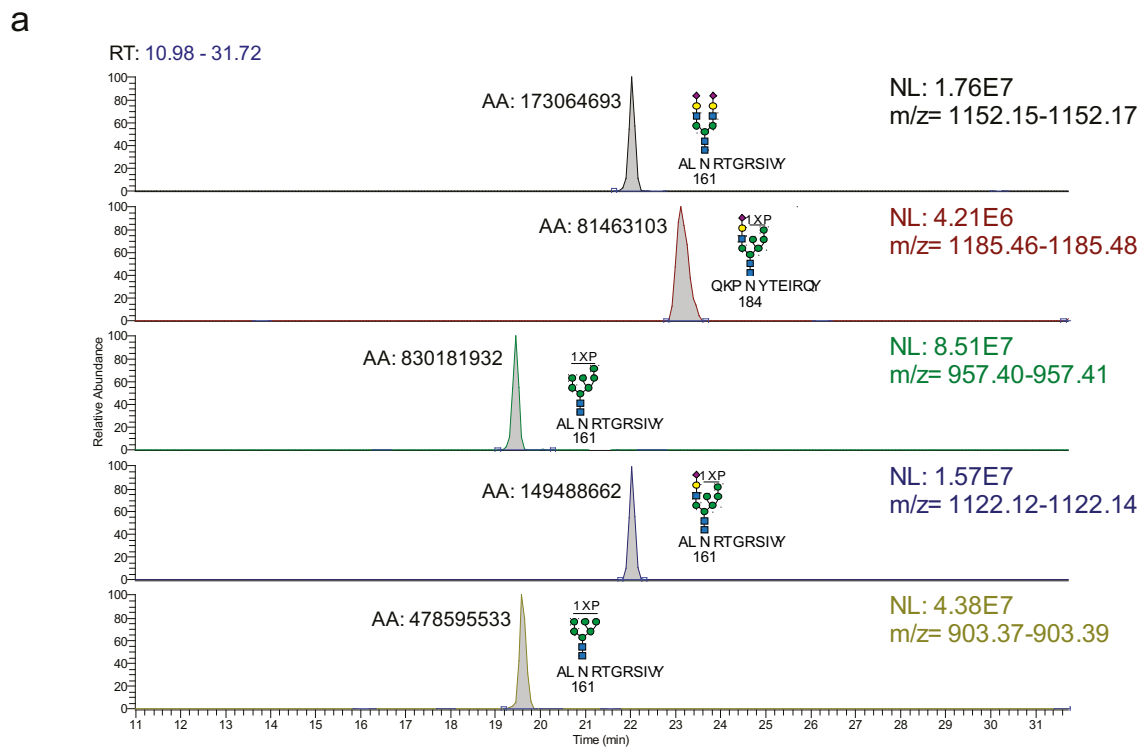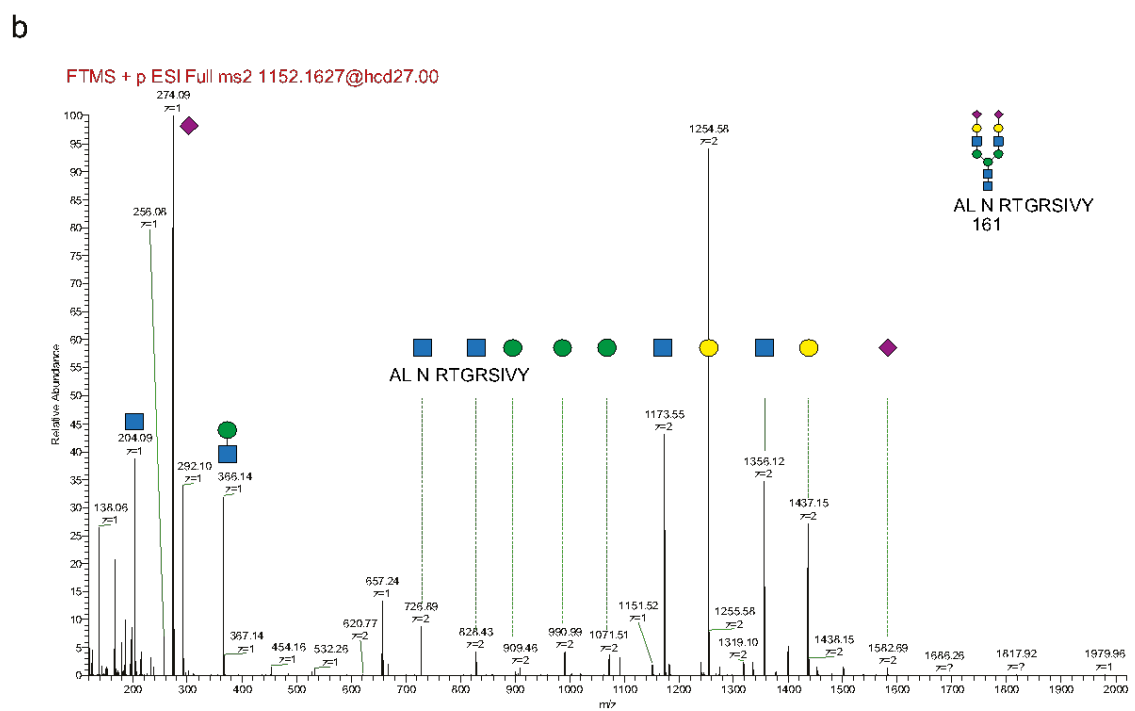

**Supplementary Figure 5.** Targeted MS/MS manual annotation of the most representative glycopeptides.

**a** Extracted ion chromatograms of 5 representative glycopeptide precursors of GLA produced in CHO WT. **b-f** MS2 manual annotation of these precursors.

C

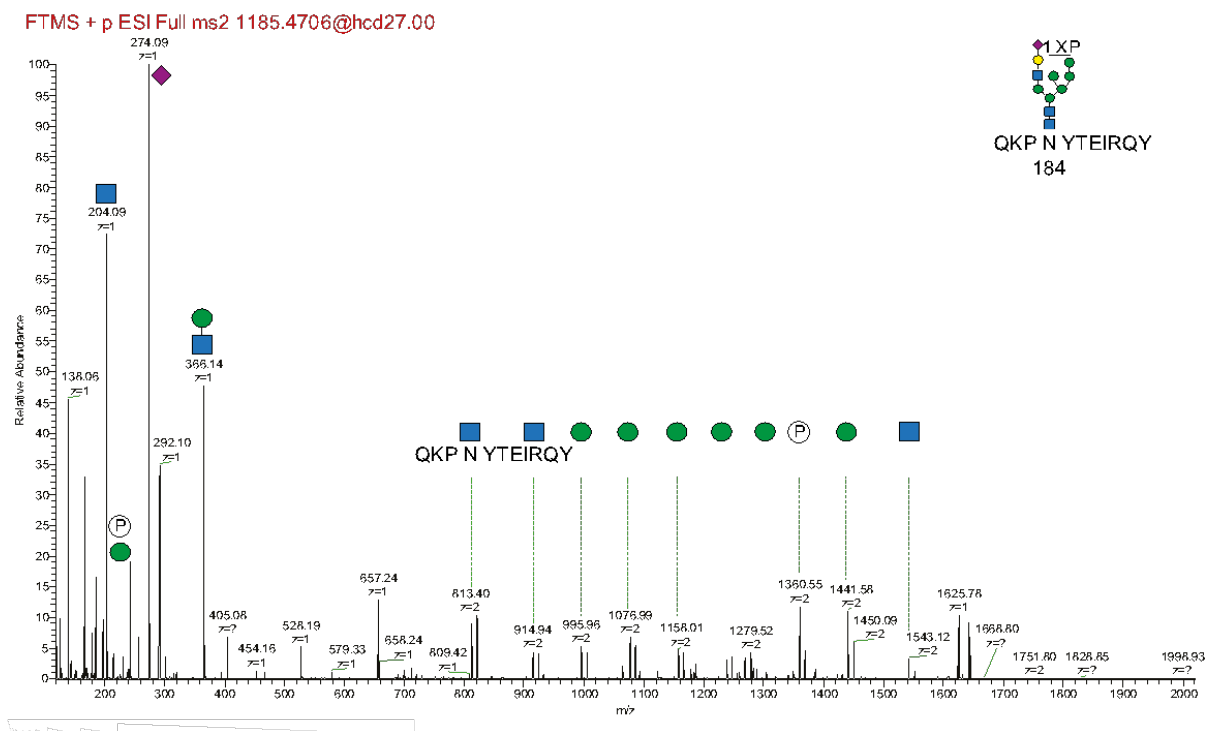

d

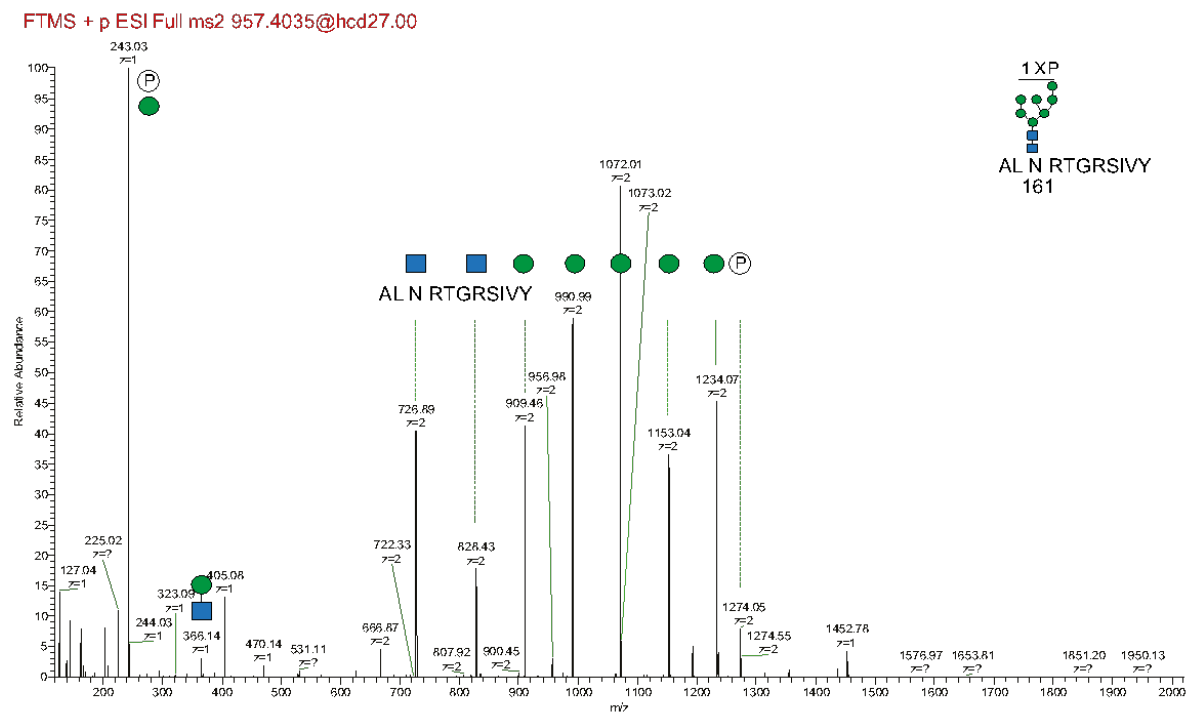

Supplementary Figure 5 continued. (Page 2 of 3, continued)

e

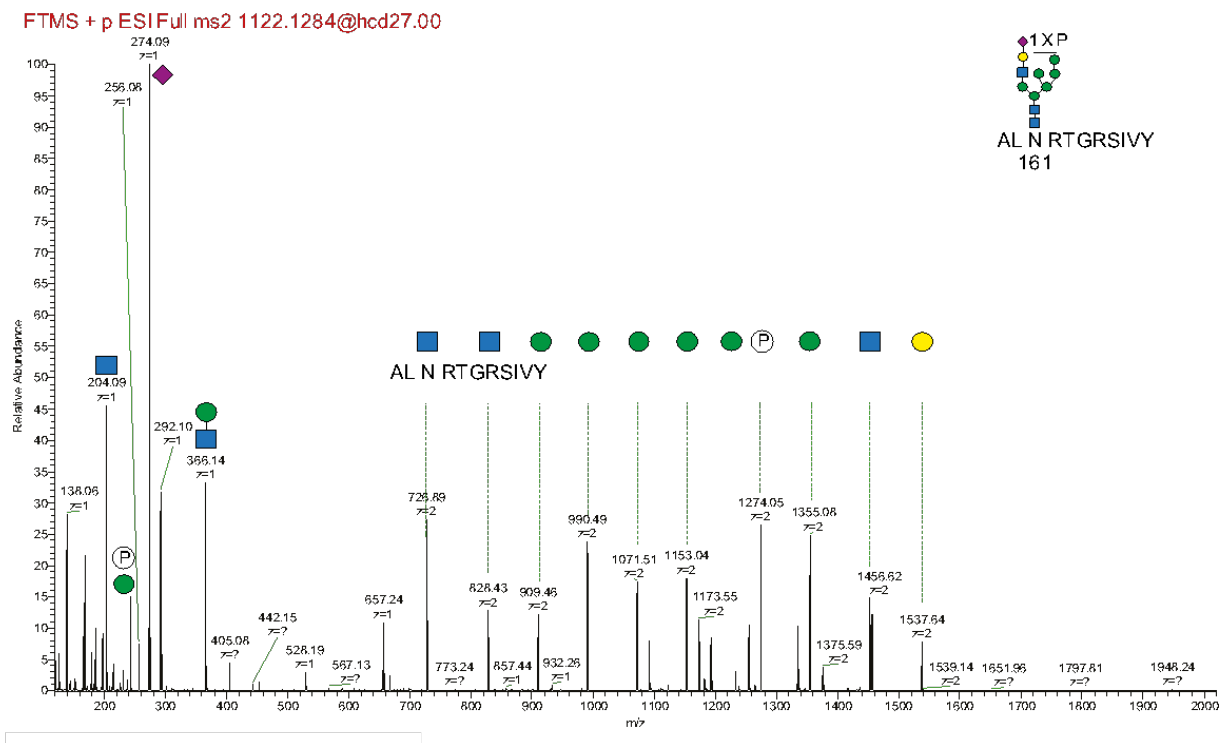

f

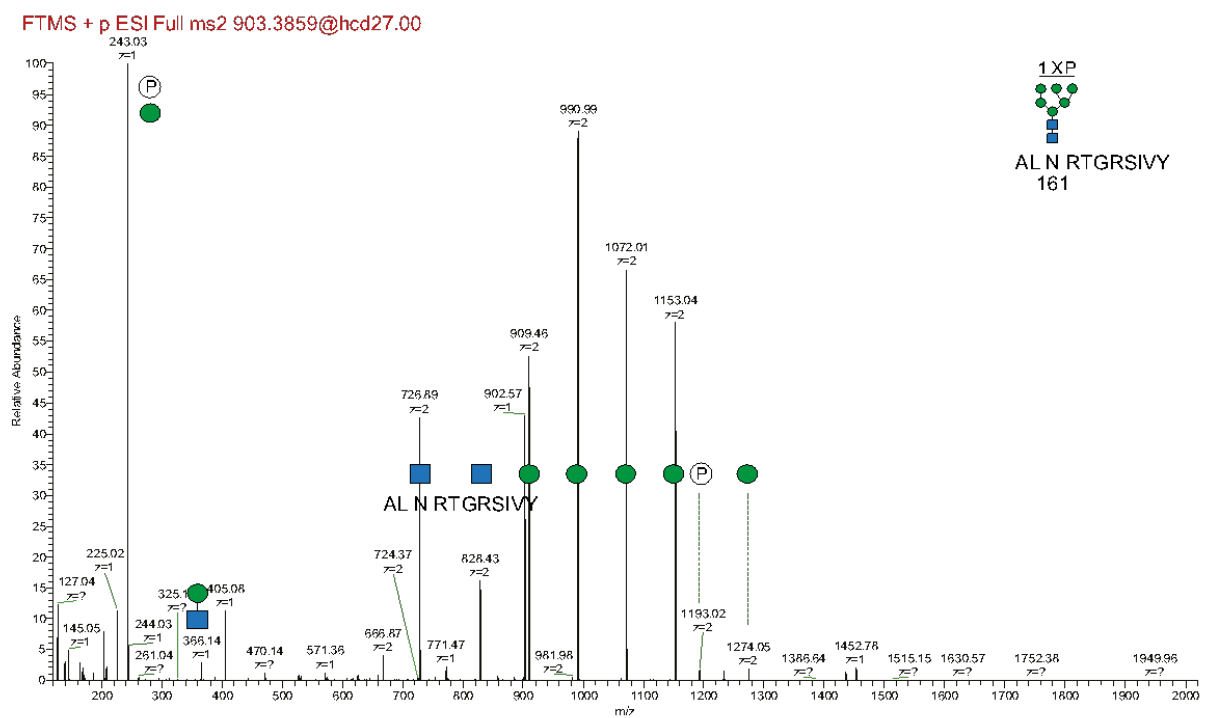

Supplementary Figure 5 continued.

(Page 3 of 3)

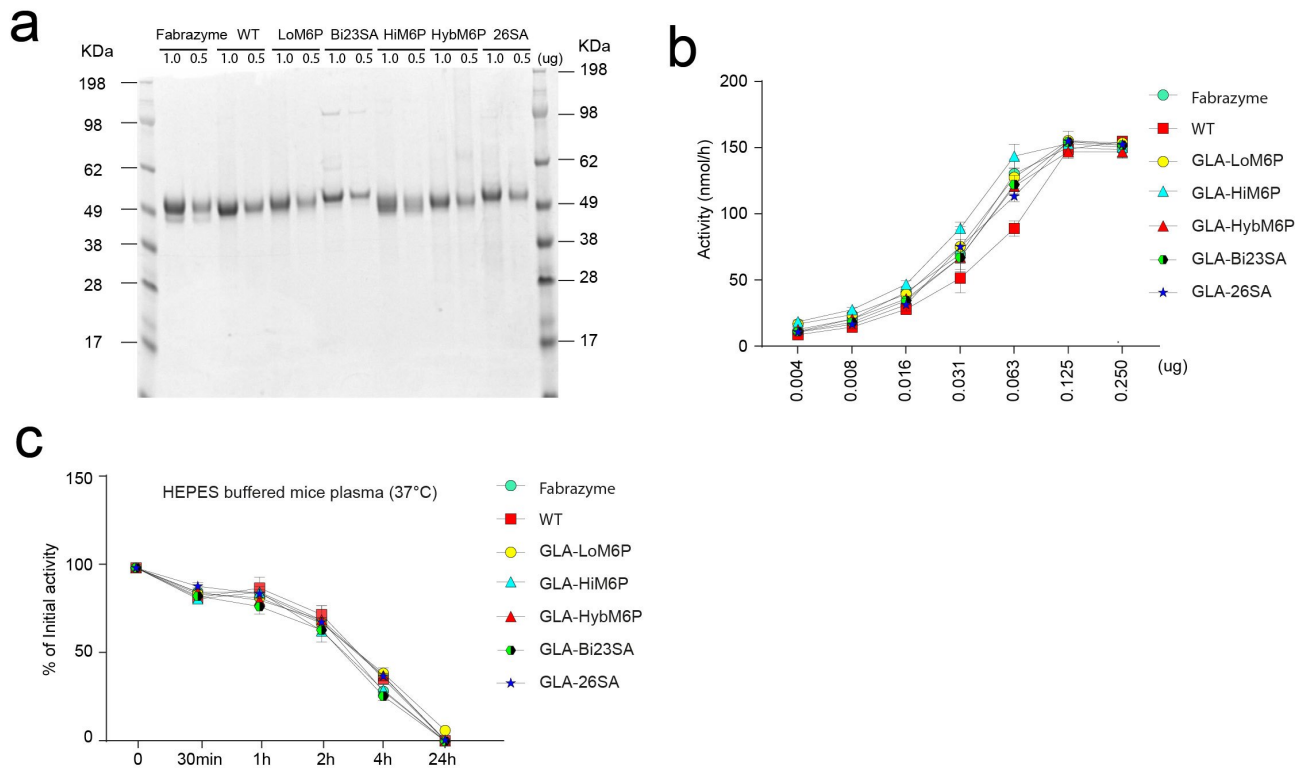

**Supplementary Figure 6.** In vitro assay of enzyme specific activity and plasma stability of GLA glycovariants.

**a** SDS-PAGE Coomassie analysis of the purified GLA variants used in mouse studies. **b** Specific activity of GLA variants assessed by a pNP-Gal enzyme assay. Release of p-nitrophenol per hour was used to show the enzyme activity. Each data point represents the mean of three replicates  $\pm$  Standard Deviation (SD). **c** In vitro stability of GLA variants (10  $\mu$ g/ml in HEPES buffered mouse plasma) at 37°C was measured by the remaining activity. Each data point represents the mean of three replicates  $\pm$  SD. Source data are provided as a Source Data file.

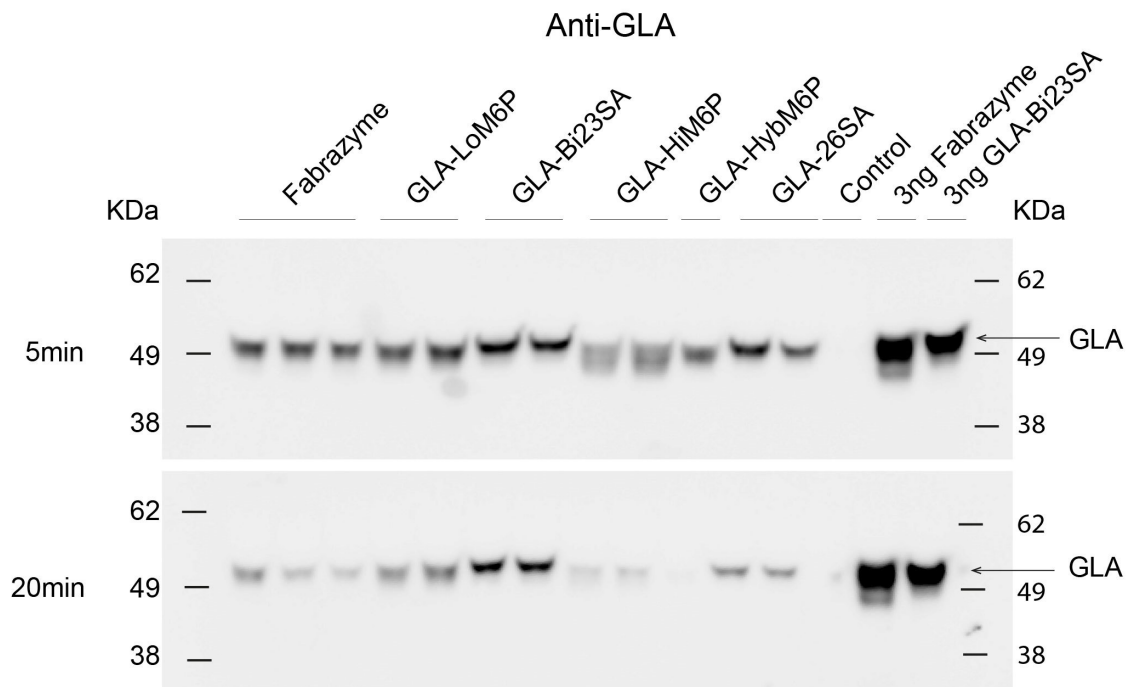

**Supplementary Figure 7.** SDS-PAGE Western blot analysis of infused GLA glycovariants in mouse plasma.

Plasma from mice infused with 1 mg/kg GLA variants used in Figure 5c collected at 5 and 20 min time points were analyzed. Blood samples were collected from tail vein bleeds, and plasma separated by centrifugation and diluted 100-fold in 0.1% BSA. Each lane represent one randomly selected mouse from the indicated group, and 10  $\mu$ l of the diluted plasma was loaded in each lane. Control indicates was plasma collected from an untreated Fabry mouse. 3 ng Fabrazyme and GLA-Bi23SA was loaded respectively as positive controls. A rabbit anti-GLA polyclonal antibody (Sigma) was used 1:1,000 and an HRP-conjugated goat anti-rabbit immunoglobulins 1:3,000 (Dako P0448). Source data are provided as a Source Data file.

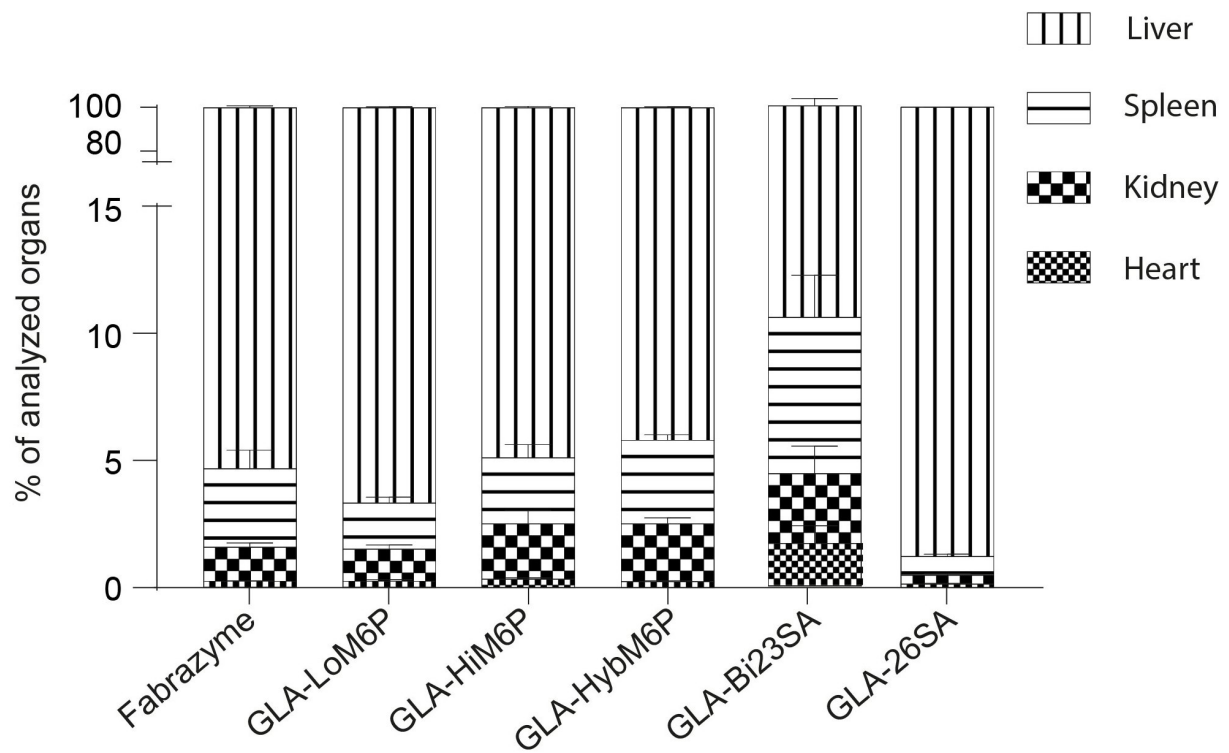

**Supplementary Figure 8.** Relative distribution of GLA glycovariants among the four major visceral organs.

GLA enzyme activity in dissected organs was assayed 24 h after 1 mg/kg infusion (same group as Figure 5e, Exp. #1). Activities in each whole organ and the sum of total recovered activities in the four major visceral organs were calculated. Relative distribution was shown by the % of each organ among the sum of total recovered activities. Error bars are presented with SD. Source data are provided as a Source Data file.

**Supplementary Table 1.** CRISPR gRNA design and list of PCR primers used for gRNA target sites.

| Gene           | gRNA                   | Forward primer (5'-3') | Reverse primer (5'-3')    |
|----------------|------------------------|------------------------|---------------------------|
| <i>Acp2</i>    | GCTCTGCGGCAGCGCTATAG   | TCGTCTCTTCCCAGACAAGC   | TAGGGTCTGTGAGCCATCCC      |
| <i>Acp5</i>    | GGATGCACGGACGGTACTGC   | GTGCAGTTTTTCAGGGGCTTG  | CTCCCCAGAGTAAGGTCCCA      |
| <i>Alg1</i>    | TTCTGCAAGAGCTCATCTCG   | CCCCAGTACACAACACTACCC  | AGTACATGCTGGCCTTGAACA     |
| <i>Alg2</i>    | CTGTGACGTGAAGATATGGA   | CTGCTGCTGGACAGTTCCAA   | ATTGCGAAGCTCGAGCGAA       |
| <i>Alg3</i>    | GCTGCTGGGCTGCGGAAACG   | TAGCTAGAAACCCTGGTGCC   | TAGTGAACCTCACATGCCACCC    |
| <i>Alg5</i>    | GGACTCTAAGTTCACHTTACG  | TAGTAGGAGAGAGCCGACCC   | CTTGGGTTCCTCCAGCAAGT      |
| <i>Alg6</i>    | TCTTAATAGGACTCACAGTG   | AAGCAGATGCAGCCACTCA    | CAAGTACGCGACTTAGCAGGA     |
| <i>Alg8</i>    | TCCGTGTACTTCAAAAATCCG  | GTGCAGTGGTCTAAGAACCCA  | TCAAGGCTTGGCAGCTTAC       |
| <i>Alg9</i>    | GAGCAGACATTTGAAAGCAG   | GCCCAAGACCATCGGTTAGAT  | TGTCCGGATTTAGTCTTCGCT     |
| <i>Alg11</i>   | ACTGGTGACATTAATGTCTAG  | TGAGTCCCTTTCTTTTGTGCC  | TCAGGAACACGCTGTGTCTAG     |
| <i>Alg12</i>   | AAATCACCAGGCAAGTCAGG   | CAGTGTGACCTTAAGCAGGGT  | CAGGTCATGCGTAGCCTGTA      |
| <i>Alg13</i>   | GATCTTGTCTATCAGCCACGC  | AGTTATGAACCACGGAGCCA   | TTGGAAGCTTAGCCAAGTGGT     |
| <i>Alg14</i>   | CTGCGGCAGCTAGAATCAGG   | TTTGACCGCCCAACTCATCA   | AGCGCTCGTAAAGGTGCTAA      |
| <i>B4galt1</i> | GGGCGGTCTGTTATTTCCCCCA | CCCAAACCTCACCTGGTTGAT  | GCTGGCTAACATCTCGTTCC      |
| <i>B4galt3</i> | GCAGGACGGTACCGCCCCC    | ATGCCATATGCAAGCTGCTG   | GTGGGTCTGTGTGCGTATC       |
| <i>Fam20c</i>  | GGGAAGCCTGACCAGATCGA   | ATAGGTACCGACTCTCCCT    | GCCAATAACATCTGCTTCTACGG   |
| <i>Furin</i>   | GACCAAGCGGGACGTGTATC   | GCCCATCTCGGTCTCATTGC   | TGGGGAGAAGACCAGAACC       |
| <i>Fut8</i>    | GATCCGTCCACAACCTTGGC   | AGAGTCCATGGTGTCTCTGC   | TACTGTTAAGGGGAGGGGGA      |
| <i>Ganab</i>   | GAAGGCTTCGATCCTCTAGC   | GTCTGCTTGGCAACCCCAAA   | CACACCCAGTCTCTTCCCAA      |
| <i>Gnptab</i>  | GTCACATTCATCGCATCGAG   | ACCAACGGGCAGATTCCTTC   | CTAGGTGCCACCCATCTTAG      |
| <i>Gnptg</i>   | GCGATGGCGGTGCGGGTGGC   | CTTCCGGTTTTGAGCGCAG    | CAGCCAAGGGCTTTCTCTCG      |
| <i>Golph3</i>  | GAAAGGCTCAGTGCAACACT   | GCACAACACTGACTCCAGGATG | GAGCTCTTCAGATGCCATAACC    |
| <i>Golph3l</i> | TGACTTCAGTTCGACGGGTA   | CTCTTTCCCATGTTCTCTCCA  | TGTGTGTGTATAGGTCTTCTGTGG  |
| <i>Igf2r</i>   | GACAAAAACCTGTCTGATCAG  | GCTACACATGGGAGGCTGTT   | CAAACCCAAAGCTGCGGAAA      |
| <i>Lrp2</i>    | TCACACAAGGAATTCAGTG    | ATCAGTGCCCACTGCCTAAC   | AAGGAACCCAGGTCAAGCAA      |
| <i>M6Pr</i>    | GCTATAGATTCAGAGTATGC   | AAGGGAGGGGTGCAGTTTTT   | GACCAGCTGTGGAAGTAGGC      |
| <i>Man1a1</i>  | GTAATATACGCTTTCGTCCG   | TGGGCAAGCACACAGGTTTA   | TGACCACCGGAACACGAAAA      |
| <i>Man1a2</i>  | GTCTGTGTTCGTGCGGGTCCA  | CCACAGGGCTACCTTGAGAC   | GTCTTCCAGGCTATGGCTC       |
| <i>Man1b1</i>  | GAGTACATAACCACCTATCGG  | AGCACCAGCACAAAGGGATT   | GCTTTCACCCCTCTCATTACGC    |
| <i>Man1c1</i>  | GCCCCGGGCGAGGACGATCC   | TGGAGGTGATGGCCGAAAAC   | CAGTGTGCCTGAAGGGTCTC      |
| <i>Man2a1</i>  | GAGTGAAGCCTCGATCGGGT   | TAATCACAGCTGCGAGGTGG   | ACTGCTATGCACCCCCATTC      |
| <i>Man2a2</i>  | GCCCAGAGAAAGCGTCTGTCG  | AGCGGCATATTCAGGGGAAC   | GGGACTGCATACATTTGGCCT     |
| <i>Manea</i>   | ATAGCCAAGAAGTATCCACA   | CGCCCCCTTGAAAAACAAA    | CGAACTAATTACCAACCAATTGAGG |
| <i>Mgat1</i>   | GAGGGGGTTCGAGGCACACG   | GTGCTTTGGGGTGCATCCT    | TGTGACTGCACTGCCATAGG      |
| <i>Mgat2</i>   | GCGACCGGTACCGCAGCGTT   | GCGACAAAGGAAGAACGACG   | TAGGTCTCTGGGGCAGTCTC      |
| <i>Mgat4b</i>  | GAGAGGCAGGCGCTGCGGGA   | TAGCCTGTGTGTCAACCC     | TGGGGAAGGGACAGGTTAGA      |
| <i>Mgat5</i>   | GACAATCTCGTCAATGGCAC   | ACCTGCAGAGTTTTTCAGTTCT | GCCTTCAACAACATCATGCCA     |
| <i>Mogs</i>    | GGTGTCCCTGTTCTTCTACG   | TTTAGCTCAGCCCACTCCAG   | CTCCCTACCCGTACCACTCT      |
| <i>Nagpa</i>   | GGGCTGCAGAACGCGCAGTT   | AGAACGGTGGTTTTCTCCGC   | GCGTTCAATGACACACGACT      |
| <i>Sort1</i>   | TTAACAGCAGAGGTATCTGG   | AGGACCATGCCCTGCTCTC    | ATAGCCAGATGGGGACAGGTAG    |
| <i>Spp13</i>   | GAGGCTTGGCAGGCGGACAA   | ATGTCACCGACAAACGGGAC   | CCACACCAACTGATCCCC        |
| <i>St3gal4</i> | GGTCAAGTGGGCCGACTCA    | AAGAGCGTGTCTGGGTGTT    | GCAGGTCCACTTCTGGATT       |
| <i>St3gal6</i> | GGAGTTGTGATCATTTGTGAG  | TCTTGGGTGCTTCTGAGTGTG  | GGACACAGAAAATGGGATGTTG    |



**Supplementary Table 2.** Summary of CHO mutant clones stably expressing GLA and cell line ancestry.

| Project number | Targeted genes                                     | Parental CHO line |
|----------------|----------------------------------------------------|-------------------|
| FAB399         | KO <i>Nagpa</i>                                    | WT#H9*            |
| FAB400         | KO <i>Gnptab</i>                                   | WT#H9             |
| FAB441         | KO <i>Igf2r</i>                                    | WT#H9             |
| FAB442         | KO <i>Man1a1</i>                                   | WT#H9             |
| FAB443         | KO <i>Man1a2</i>                                   | WT#H9             |
| FAB444         | KO <i>Man1b1</i>                                   | WT#H9             |
| FAB445         | KO <i>Man1c1</i>                                   | WT#H9             |
| FAB446         | KO <i>Mogs</i>                                     | WT#H9             |
| FAB451         | KO <i>Acp2</i>                                     | WT#H9             |
| FAB453         | KO <i>Gnptg</i>                                    | WT#H9             |
| FAB454         | KO <i>Acp5</i>                                     | WT#H9             |
| FAB462         | KO <i>Acp2/5</i>                                   | WT#H9             |
| FAB478         | KO <i>Alg3</i>                                     | WT#H9             |
| FAB479         | KO <i>Alg6</i>                                     | WT#H9             |
| FAB480         | KO <i>Alg9</i>                                     | WT#H9             |
| FAB494         | KO <i>St3gal4/6</i>                                | WT#H9             |
| FAB495         | KO <i>Mgat1</i>                                    | WT#H9             |
| FAB496         | KO <i>Mgat2</i>                                    | WT#H9             |
| FAB497         | KO <i>Mgat4b/5</i>                                 | WT#H9             |
| FAB499         | KO <i>Sppl3</i>                                    | WT#H9             |
| FAB532         | KI <i>ST6GAL1</i> /KO <i>St3gal4/6</i>             | FAB494 B4         |
| FAB534         | KO <i>Sort1</i>                                    | WT#H9             |
| FAB535         | KO <i>Lrp2</i>                                     | WT#H9             |
| FAB540         | KO <i>Fut8</i>                                     | WT#H9             |
| FAB546         | KO <i>Gnptab/g</i>                                 | WT#H9             |
| FAB555         | KO <i>Furin</i>                                    | WT#H9             |
| FAB560         | KO <i>Manea</i>                                    | WT#H9             |
| FAB567         | KO <i>Mgat4b/5/Gnptab/g</i>                        | FAB546A2          |
| FAB568         | KO <i>Mgat1/Gnptab/g</i>                           | FAB546A2          |
| FAB570         | KO <i>Mgat2/Gnptab/g</i>                           | FAB546A2          |
| FAB571         | KO <i>B4galt1/3/Mgat4b/5/Gnptab/g</i>              | FAB567H3          |
| FAB572         | KO <i>Ganab</i>                                    | WT#H9             |
| FAB583         | KI <i>ST3GAL4</i> /KO <i>Mgat4b/5/Gnptab/g</i>     | FAB567H3          |
| FAB584         | KO <i>Fut8/Mgat4b/5/Gnptab/g</i>                   | FAB567H3          |
| FAB604         | KO <i>Fam20c</i>                                   | WT#H9             |
| FAB605         | KO <i>Golph3</i>                                   | WT#H9             |
| FAB606         | KO <i>Golph3l</i>                                  | WT#H9             |
| FAB611         | KO <i>Alg3/Mgat1</i>                               | FAB495B10         |
| FAB662         | KO <i>Alg8</i>                                     | WT#H9             |
| FAB664         | KO <i>Alg12</i>                                    | WT#H9             |
| FAB667         | KO <i>Alg5</i>                                     | WT#H9             |
| FAB677         | KI <i>GNPTG</i>                                    | WT#H9             |
| FAB688         | KO <i>B4galt1/3</i>                                | WT#H9             |
| FAB695         | KI <i>GNPTAB</i>                                   | WT#H9             |
| FAB712         | KO <i>Man2a1/2</i>                                 | WT#H9             |
| FAB713         | KO <i>Man2a1/2/Gnptab</i>                          | FAB400C7          |
| FAB725         | KO <i>Man1a1/1a2/1b1/1c1</i>                       | FAB442G8          |
| FAB791         | KO <i>M6pr</i>                                     | WT#H9             |
| FAB792         | KI <i>GNPTAB</i> /KO <i>Alg3</i>                   | FAB695G2          |
| FAB793         | KI <i>GNPTAB</i> /KO <i>Alg3</i>                   | FAB695A8          |
| FAB819         | KI <i>GNPTAB/G</i>                                 | FAB695G2          |
| FAB857         | KI <i>ST6GAL1</i> /KO <i>St3gal4/6/Gnptab</i>      | FAB532D2          |
| FAB870         | KI <i>ST6GAL1</i> /KO <i>St3gal4/6/Gnptab/Fut8</i> | FAB857D2          |

\* Clone WT#H9 was used as parental clone for all gene engineering.

**Supplementary Table 3.** Summary of CHO mutant clones stably expressing GBA and cell line ancestry.

| <b>Project number</b> | <b>Targeted genes</b>     | <b>Parental CHO line</b> |
|-----------------------|---------------------------|--------------------------|
| GBA826                | KO <i>Gnptab</i>          | GBA#A5                   |
| GBA827                | KO <i>Alg3</i>            | GBA#A5                   |
| GBA828                | KO <i>Mgat1</i>           | GBA#A5                   |
| GBA829                | KO <i>Alg9</i>            | GBA#A5                   |
| GBA831                | KO <i>Gnptab/Mgat1</i>    | GBA#A5                   |
| GBA900                | KO <i>Gnptab/Man2a1/2</i> | GBA826B1                 |
| GBA901                | KO <i>Gnptab/Mgat2</i>    | GBA826B1                 |

**Supplementary Table 4.** Sequence analysis of CHO mutant clones stably expressing GBA.

| Clone     | Targeted genes   | InDels | Alignment                        |
|-----------|------------------|--------|----------------------------------|
| GBA826B1  | KO <i>Gnptab</i> |        |                                  |
|           | WT               |        | <u>GTCACATTCATCGCATCGAG</u> GGG  |
| GBA827C2  | KO               | +1bp   | GTCACATTCATCGCATCGAGGGG          |
|           | KO <i>Alg3</i>   |        |                                  |
| GBA827D2  | WT               |        | <u>GCTGCTGGGCTGCGGAAACG</u> CGG  |
|           | KO               | -1bp   | GCTGCTGGGCTGCGGAAACGCGG          |
| GBA827D2  | KO <i>Alg3</i>   |        |                                  |
|           | WT               |        | <u>GCTGCTGGGCTGCGGAAACG</u> CGG  |
| GBA828D9  | KO               | +1bp   | GCTGCTGGGCTGCGGAAACGCGG          |
|           | KO <i>Mgat1</i>  |        |                                  |
| GBA828D9  | WT               |        | <u>GAGGGGGTTCGCAGGCACACG</u> GGG |
|           | KO               | +1bp   | GAGGGGGTTCGCAGGCACACGGGG         |
| GBA828E9  | KO <i>Mgat1</i>  |        |                                  |
|           | WT               |        | <u>GAGGGGGTTCGCAGGCACACG</u> GGG |
| GBA828E9  | KO               | +1bp   | GAGGGGGTTCGCAGGCACACGGGG         |
|           | KO <i>Alg9</i>   |        |                                  |
| GBA829F2  | WT               |        | <u>GAGCAGACATTTGAAAAGCAG</u> TGG |
|           | KO-allele1       | -7bp   | GAGCAGACATTTGAAAAGCAGTGG         |
|           | KO-allele2       | -2bp   | GAGCAGACATTTGATTTGTGG            |
| GBA831C8  | KO <i>Mgat1</i>  |        |                                  |
|           | WT               |        | <u>GAGGGGGTTCGCAGGCACACG</u> GGG |
|           | KO               | +1bp   | GAGGGGGTTCGCAGGCACACGGGG         |
| GBA831C8  | KO <i>Gnptab</i> |        |                                  |
|           | WT               |        | <u>GTCACATTCATCGCATCGAG</u> GGG  |
|           | KO               | +1bp   | GTCACATTCATCGCATCGAGGGG          |
| GBA831F10 | KO <i>Mgat1</i>  |        |                                  |
|           | WT               |        | <u>GAGGGGGTTCGCAGGCACACG</u> GGG |
|           | KO               | +1bp   | GAGGGGGTTCGCAGGCACACGGGG         |
| GBA831F10 | KO <i>Gnptab</i> |        |                                  |
|           | WT               |        | <u>GTCACATTCATCGCATCGAG</u> GGG  |
|           | KO               | +1bp   | GTCACATTCATCGCATCGAGGGG          |
| GBA900D6  | KO <i>Man2a1</i> |        |                                  |
|           | WT               |        | <u>GAGTGAAGCCTCGATCGGGT</u> TGG  |
|           | KO               | -4bp   | GAGTGAAGCCTCGATCGGGTGG           |
| GBA900D6  | KO <i>Man2a2</i> |        |                                  |
|           | WT               |        | <u>GCCCAGAGAAAGCGTTCGTCG</u> AGG |
|           | KO               | -1bp   | GCCCAGAGAAAGCGTTCGTCGAGG         |
| GBA900D6  | KO <i>Gnptab</i> |        |                                  |
|           | WT               |        | <u>GTCACATTCATCGCATCGAG</u> GGG  |
|           | KO               | +1bp   | GTCACATTCATCGCATCGAGGGG          |
| GBA901D9  | KO <i>Mgat2</i>  |        |                                  |
|           | WT               |        | <u>GCGACCGGTACCGCAGCGTT</u> AGG  |
|           | KO               | +1bp   | GCGACCGGTACCGCAGCGTTAGG          |
| GBA901D9  | KO <i>Gnptab</i> |        |                                  |
|           | WT               |        | <u>GTCACATTCATCGCATCGAG</u> GGG  |
|           | KO               | +1bp   | GTCACATTCATCGCATCGAGGGG          |

Note: Nucleic acids UNDERLINED are the gRNA targeting sequence;

Nucleic acids in **RED** are the PAM sequence;

Nucleic acids in **GREEN** are insertions;

Nucleic acids in **GRY** are deletions.
